# Supplementary material for: Efficient purification of ethene by an ethane-trapping metal-organic framework
Source: PubMed Central journal article supplement (PMC4846320; doi:10.1038/ncomms9697), 2015-10-29
Supplement: ncomms9697-s1.pdf [file ncomms9697-s1.pdf]

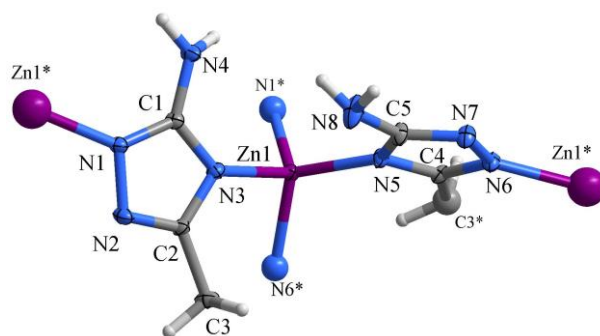

**Supplementary Figure 1.** The local coordination environment in MAF-49·H<sub>2</sub>O (probability drawn at 30%). \* represents symmetrically generated atoms.

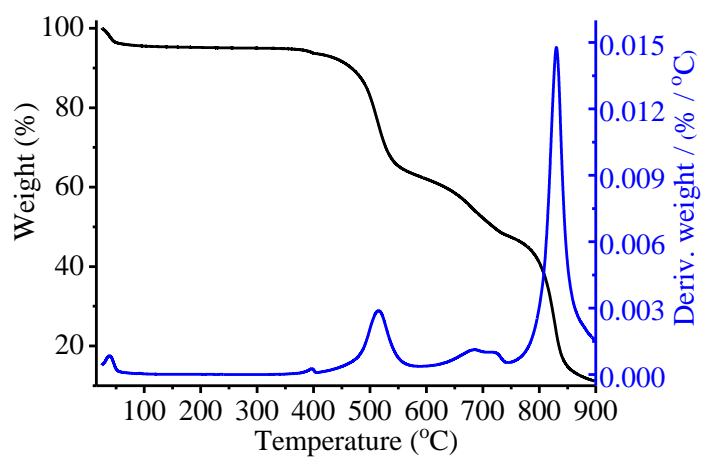

**Supplementary Figure 2.** TG curve of MAF-49·H<sub>2</sub>O.

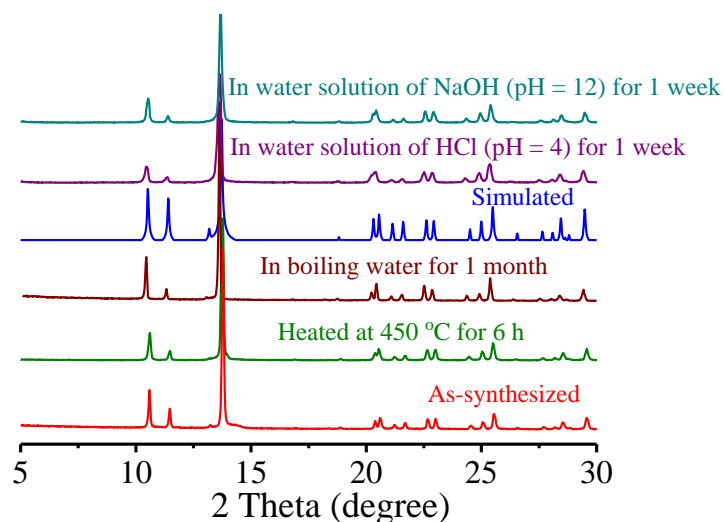

**Supplementary Figure 3.** PXRD patterns of MAF-49 after heating/adsorption/desorption treatments.

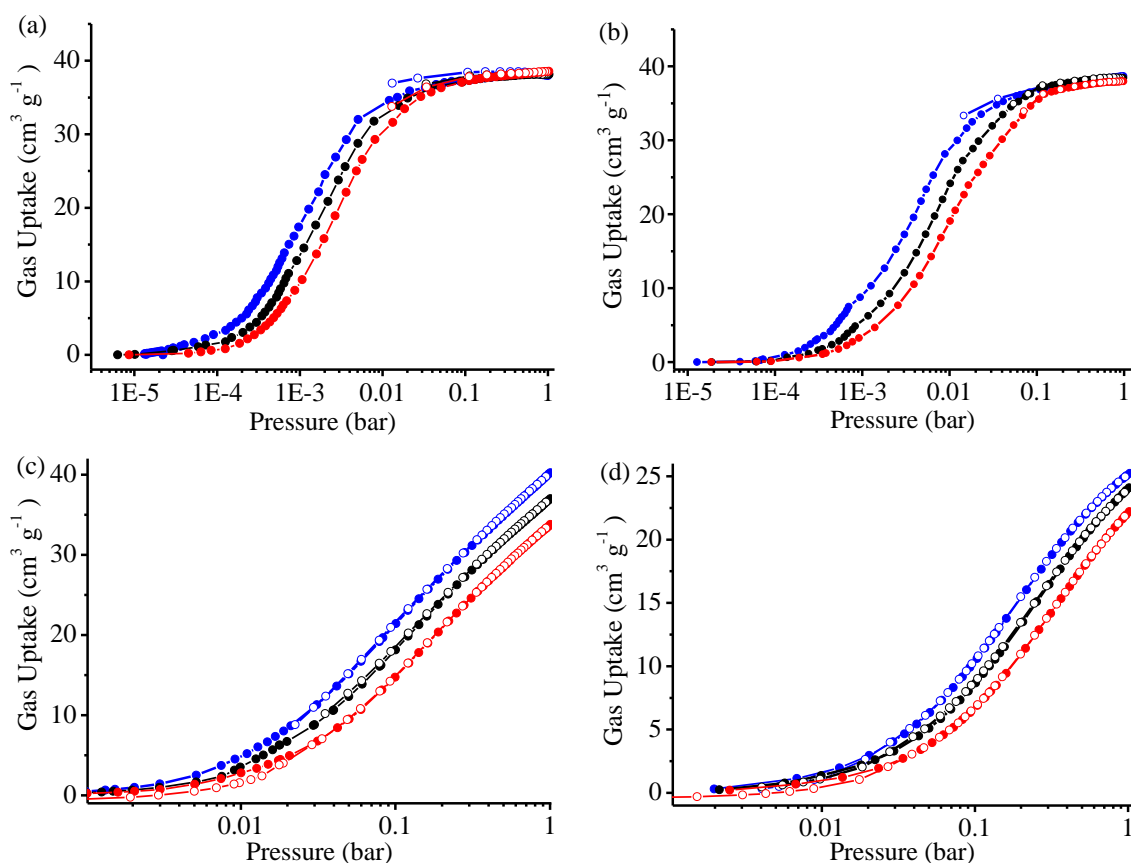

**Supplementary Figure 4.** (a)  $C_2H_6$ , (b)  $C_2H_4$ , (c)  $CO_2$  and (d)  $CH_4$  adsorption (solid) and desorption (open) isotherms of MAF-49 measured at 298 (blue), 307 (black) and 316 (red) K.

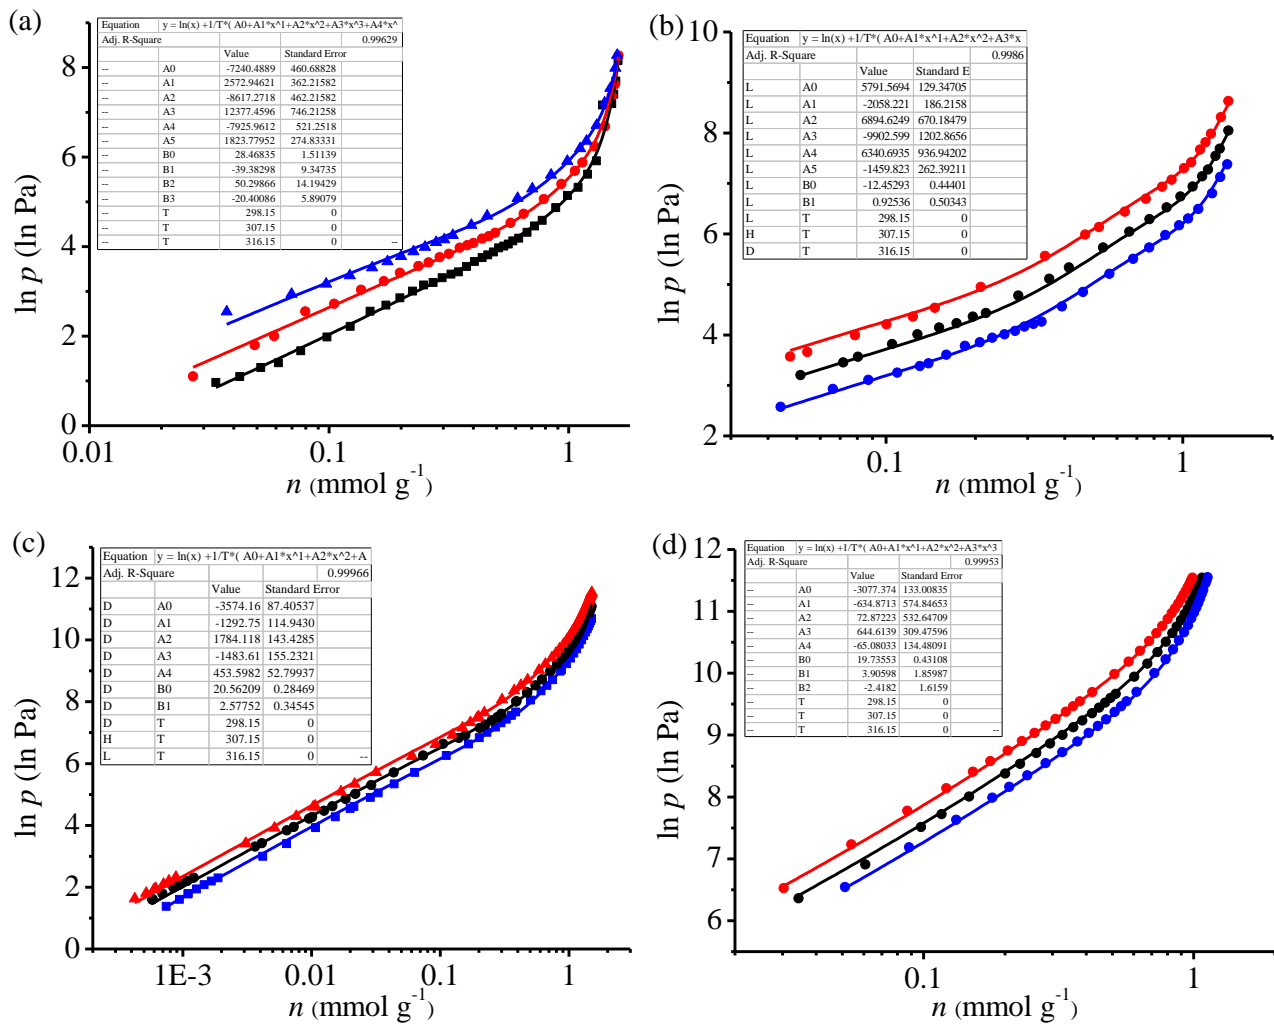

**Supplementary Figure 5.** Virial fitting (lines) of the (a) C<sub>2</sub>H<sub>6</sub>, (b) C<sub>2</sub>H<sub>4</sub>, (c) CO<sub>2</sub> and (d) CH<sub>4</sub> adsorption isotherms (points) of MAF-49 measured at 298 (blue), 307 (black) and 316 (red) K.

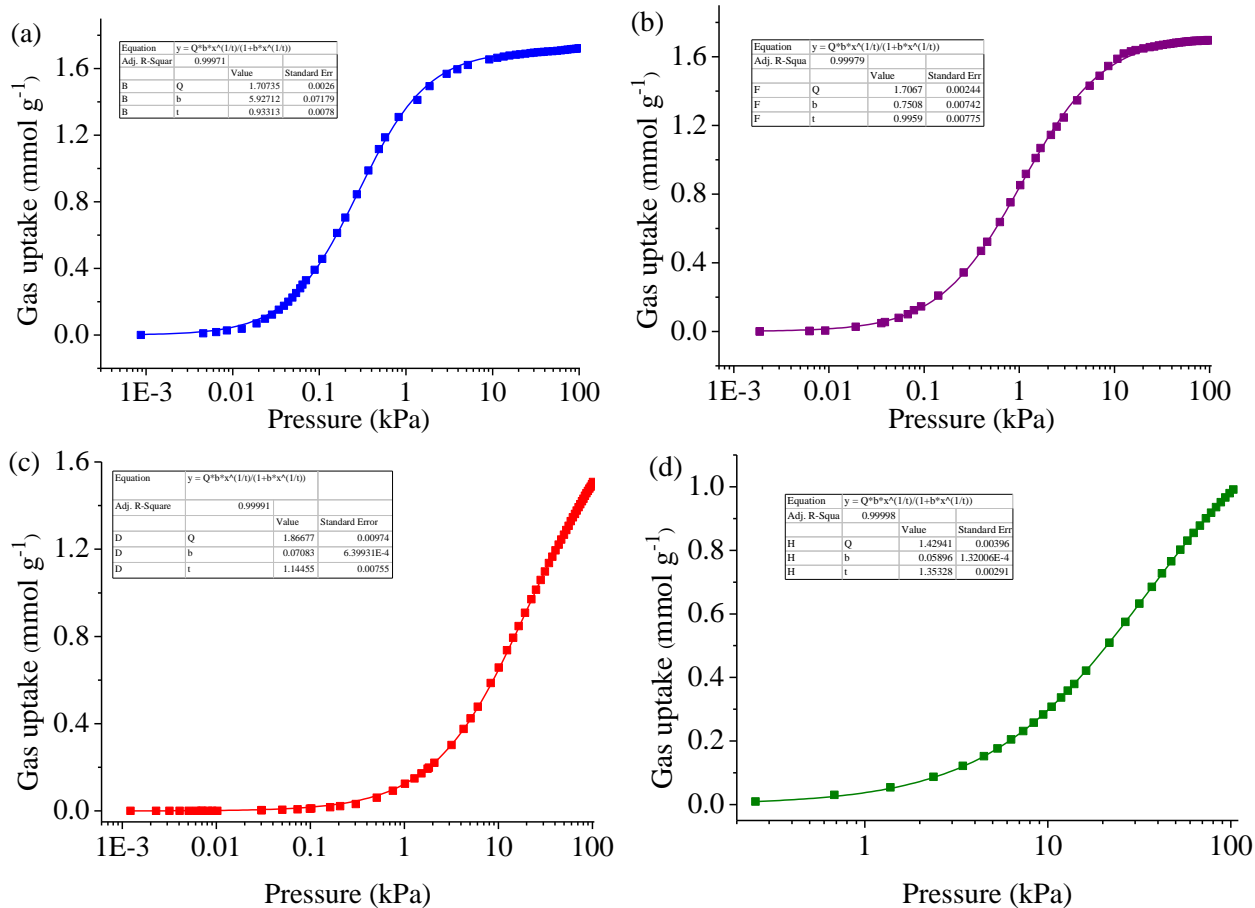

**Supplementary Figure 6.** Langmuir–Freundlich fitting (lines) of the (a)  $C_2H_6$ , (b)  $C_2H_4$ , (c)  $CO_2$  and (d)  $CH_4$  adsorption isotherms (points) of MAF-49 measured at 316 K.

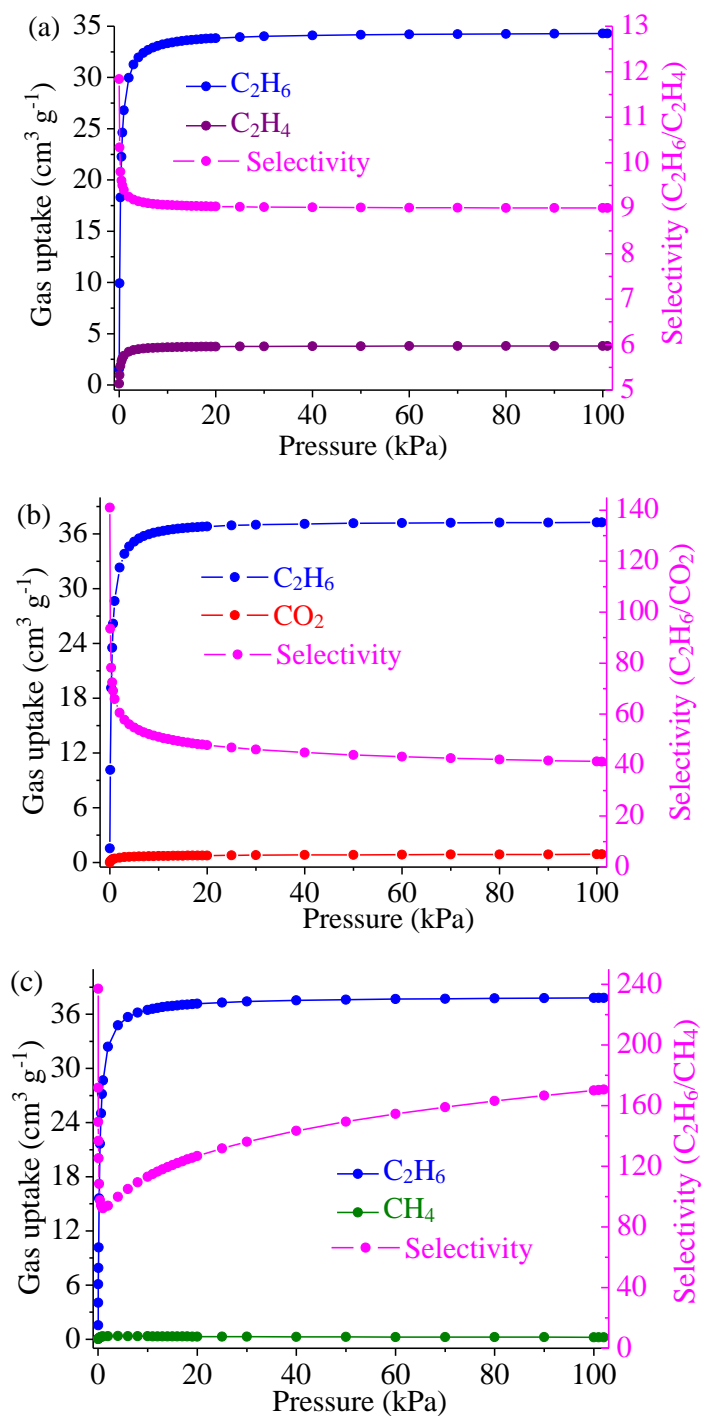

**Supplementary Figure 7.** Mixed isotherms and selectivity in MAF-49 predicted by IAST for equimolar mixtures of (a)  $C_2H_6/C_2H_4$ , (b)  $C_2H_6/CO_2$  and (c)  $C_2H_6/CH_4$  at 316 K.

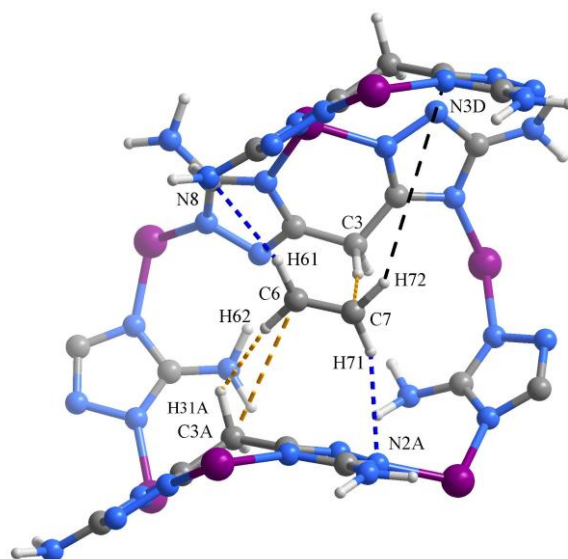

**Supplementary Figure 8.** The steric hindrance and electrostatic repulsion between the two C-H moieties of the two methylene groups from the host channel neck and the guest  $C_2H_4$  ( $C3A \cdots C6 = 3.88 \text{ \AA}$ ,  $H31A \cdots H62 = 2.10 \text{ \AA}$ ) in  $MAF-49 \cdot C_2H_4$ .

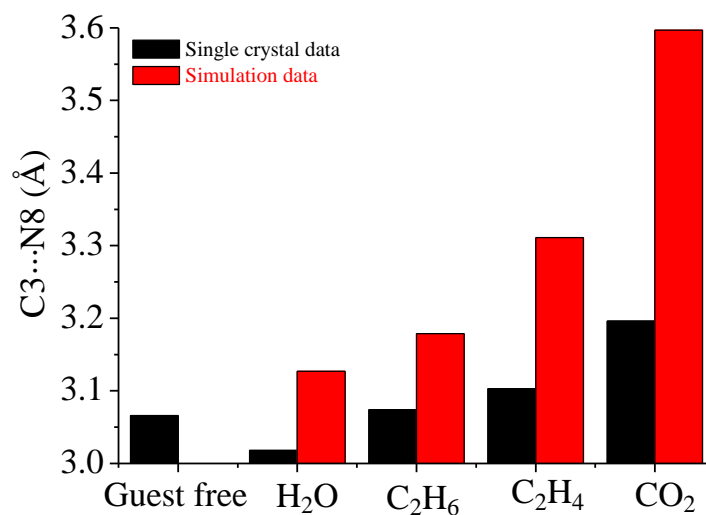

**Supplementary Figure 9.** Comparison of the channel neck sizes (defined by The  $N8 \cdots C3$  separation as shown in Figure 3) of  $MAF-49$ ,  $MAF-49 \cdot C_2H_6$ ,  $MAF-49 \cdot C_2H_4$ ,  $MAF-49 \cdot CO_2$  obtained by computational simulations and single-crystal X-ray diffraction.

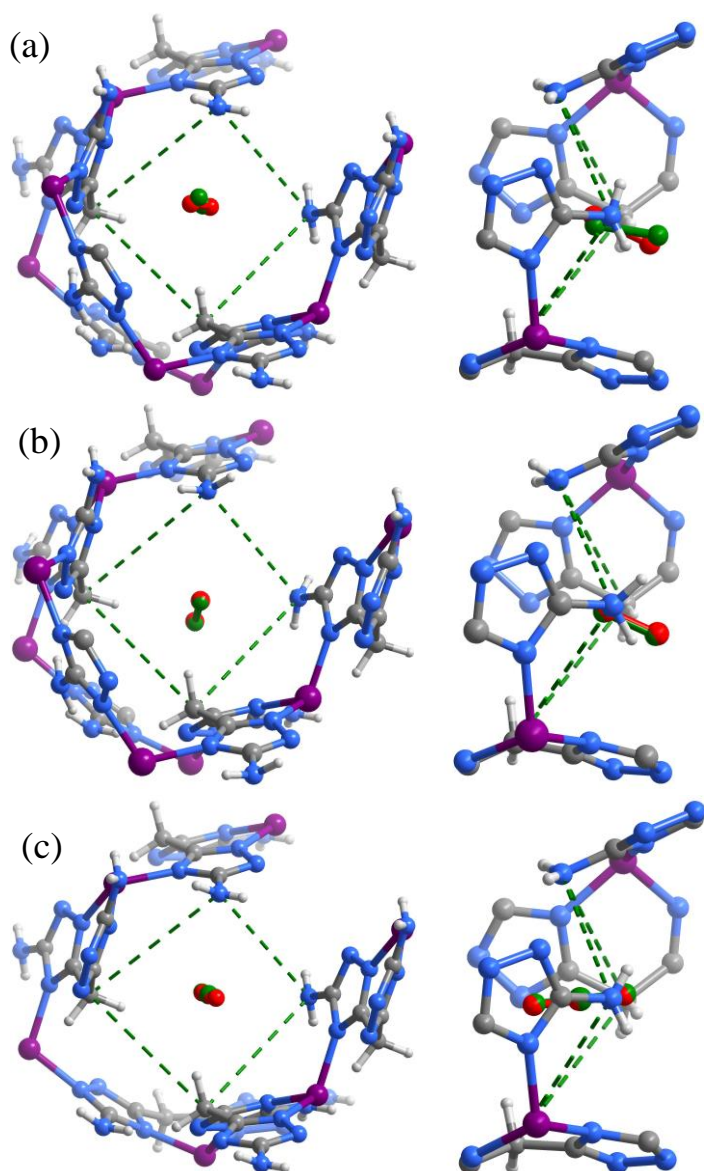

**Supplementary Figure 10.** Comparison of the preferential (a)  $C_2H_6$ , (b)  $C_2H_4$  and (c)  $CO_2$  adsorption sites (Zn purple, C dark gray, H light gray, N blue, hydrogen atoms are omitted for clarity) observed by single-crystal X-ray diffraction (red) and PDFT calculation (green). Left and Right, the structures are projected along the channel neck and perpendicular to the channel neck, respectively.

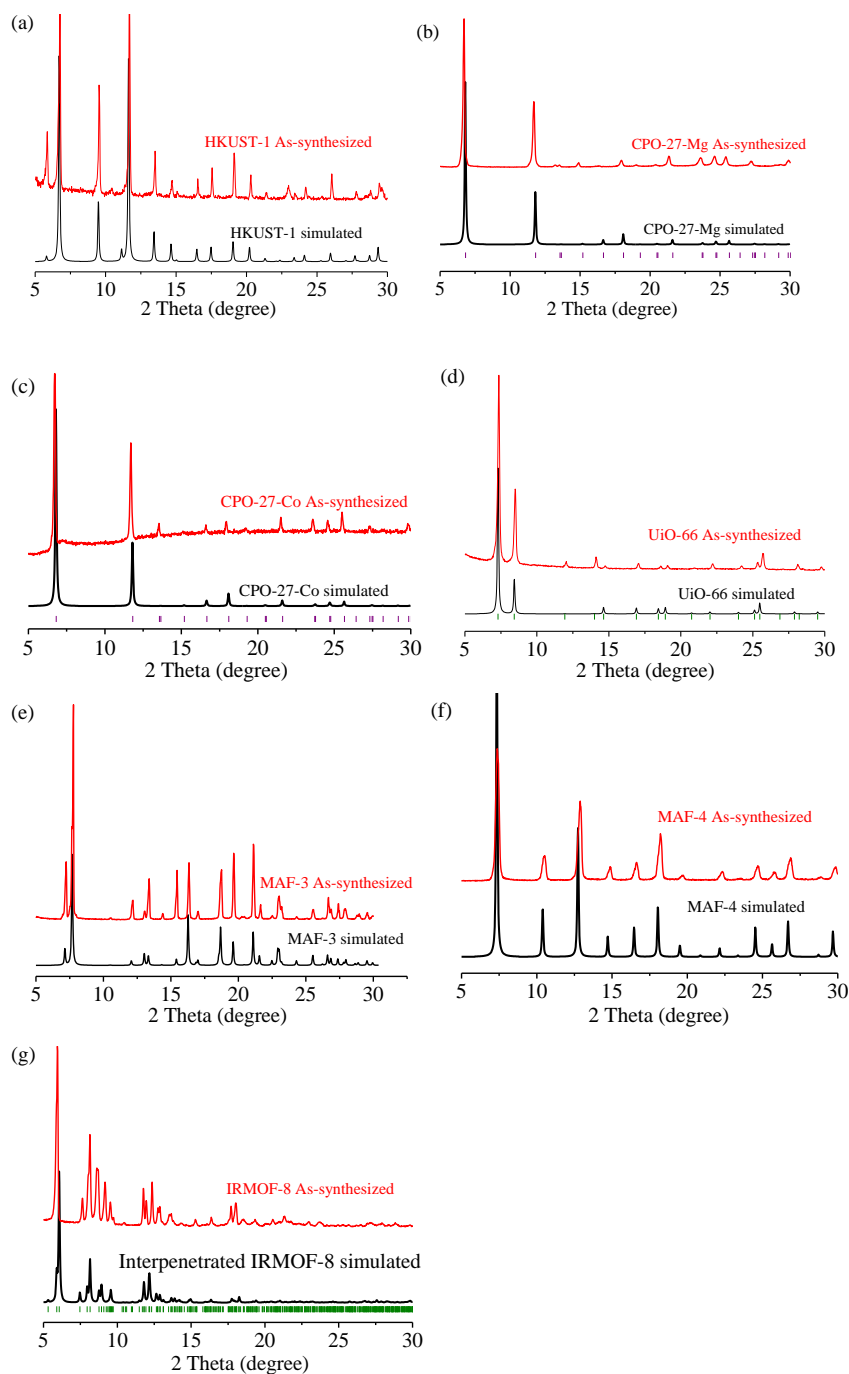

**Supplementary Figure 11.** PXRD patterns of (a) HKUST-1, (b) MOF-74-Mg, (c) MOF-74-Co, (d) UiO-66, (e) MAF-3, (f) MAF-4 and (g) IRMOF-8 samples used in this work. Note that the IRMOF-8 sample adopt an interpenetrated structure, which has been commonly obtained in the literature and used for gas (such as  $\text{H}_2$ <sup>1</sup> and  $\text{C}_2\text{H}_6/\text{C}_2\text{H}_4$ <sup>2,3</sup>) adsorption studies.



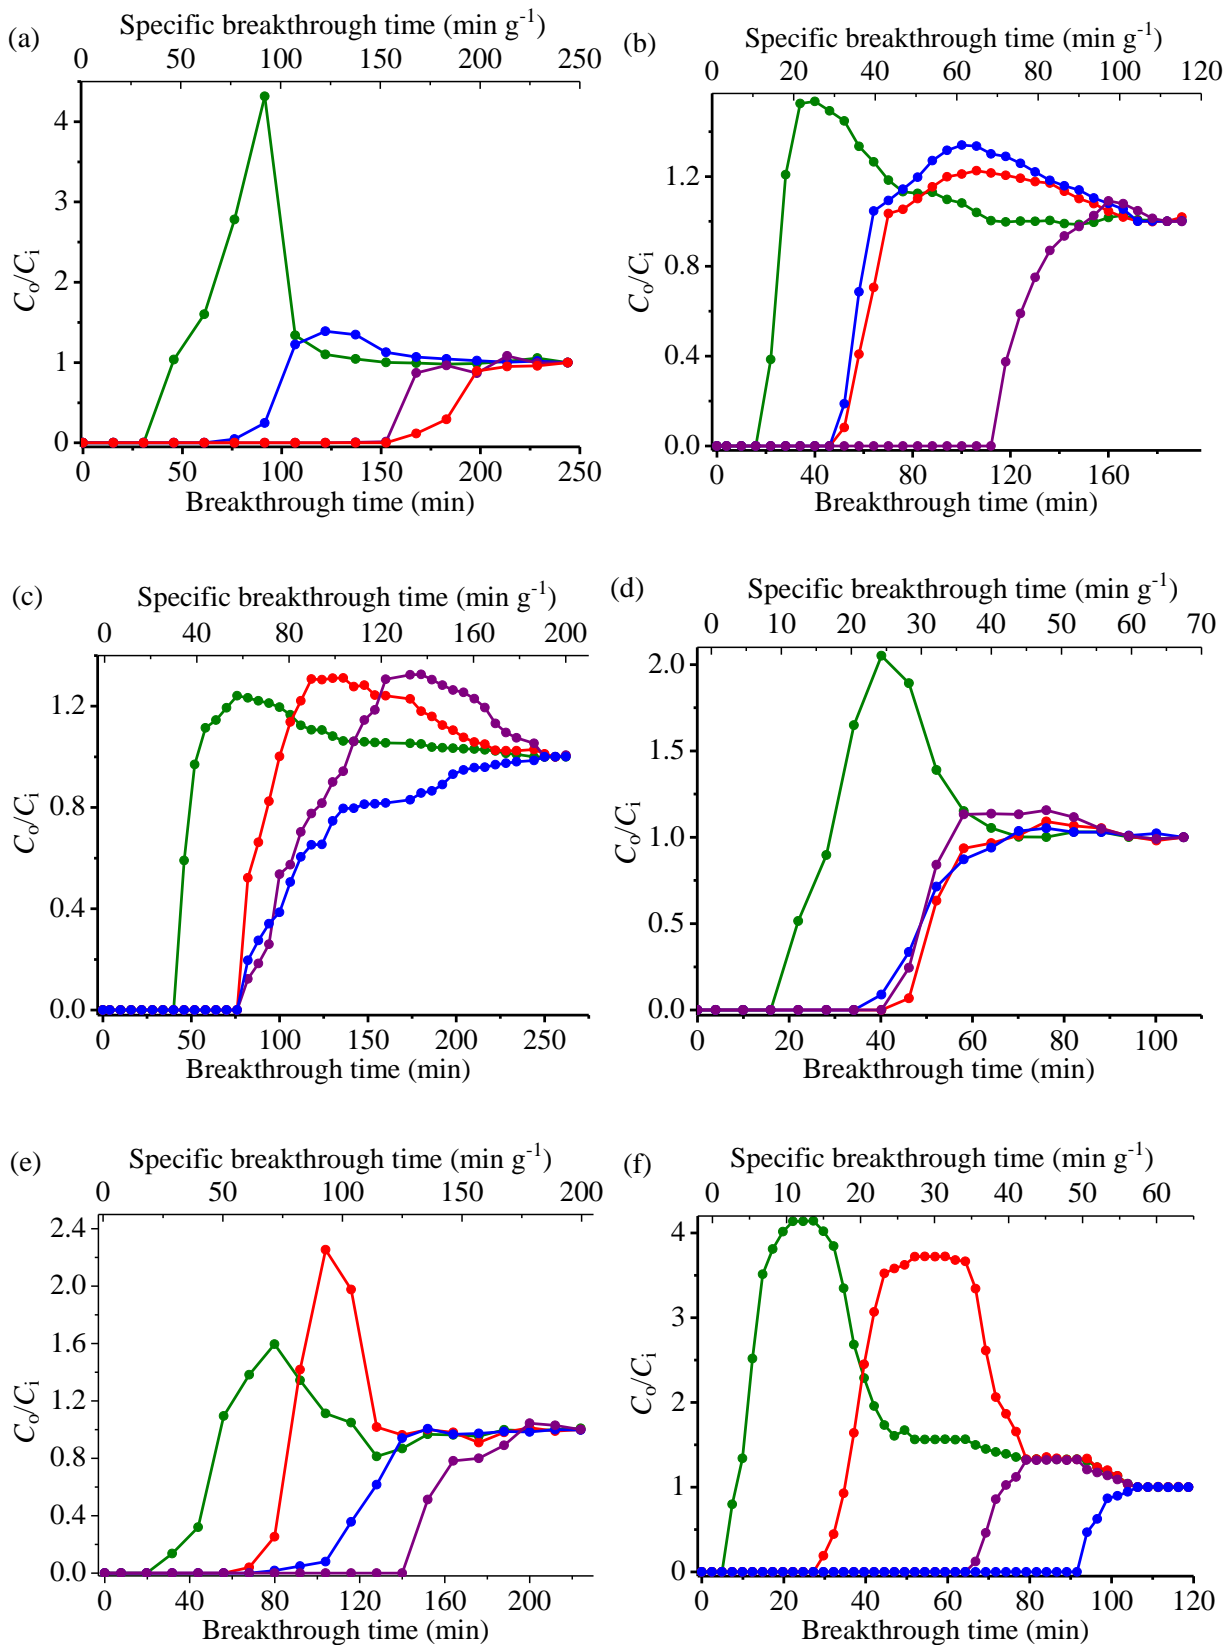

**Supplementary Figure 12.** Breakthrough curves of Figure 4 expressed using time (min) and specific breakthrough time ( $\text{min g}^{-1}$ ) as abscissa.

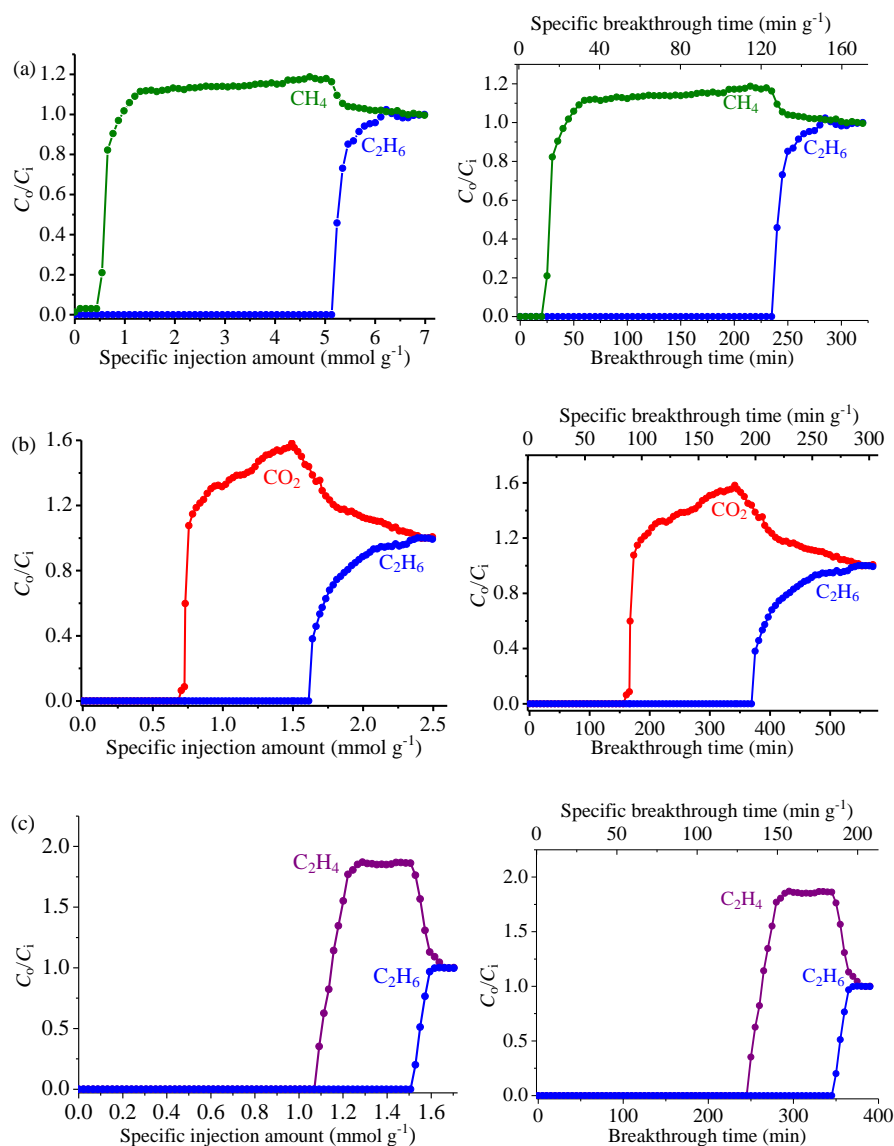

**Supplementary Figure 13.** Breakthrough curves of (a) 4:1 CH<sub>4</sub>/C<sub>2</sub>H<sub>6</sub> mixture, (b) 1:1 CO<sub>2</sub>/C<sub>2</sub>H<sub>6</sub> mixture, and (c) 1:1 C<sub>2</sub>H<sub>4</sub>/C<sub>2</sub>H<sub>6</sub> mixture for MAF-49. Left, specific injection amount (mmol g<sup>-1</sup>) as abscissa. Right, specific breakthrough time (min g<sup>-1</sup>) and breakthrough time (min) as abscissa. Lines are drawn to guide eyes.  $C_i$  and  $C_o$  are the concentrations of each gas at the inlet and outlet, respectively.

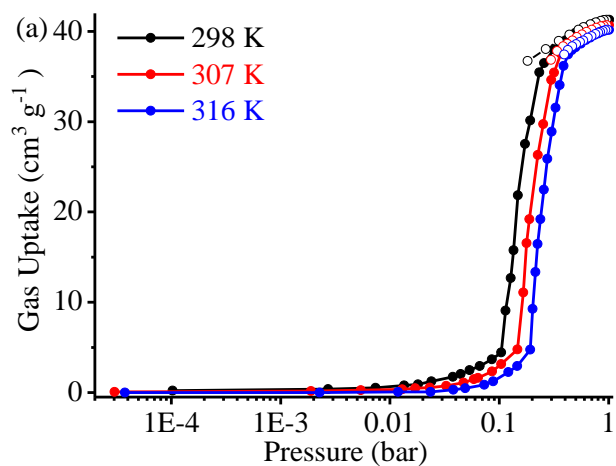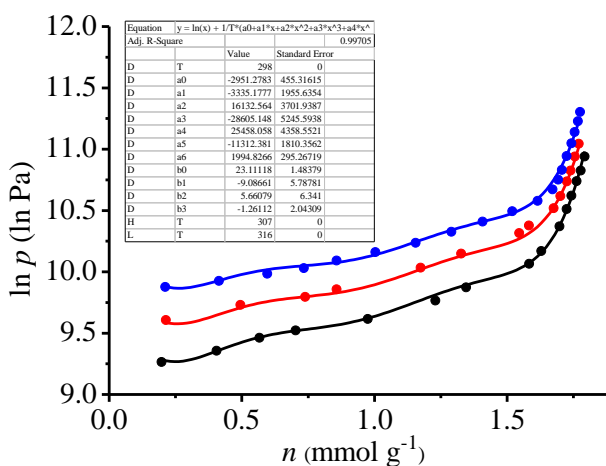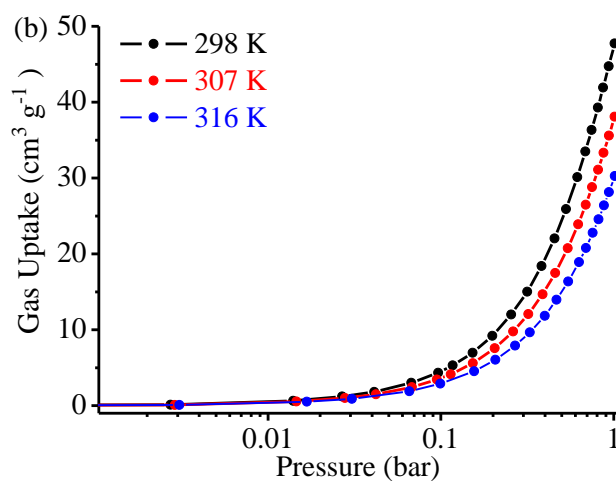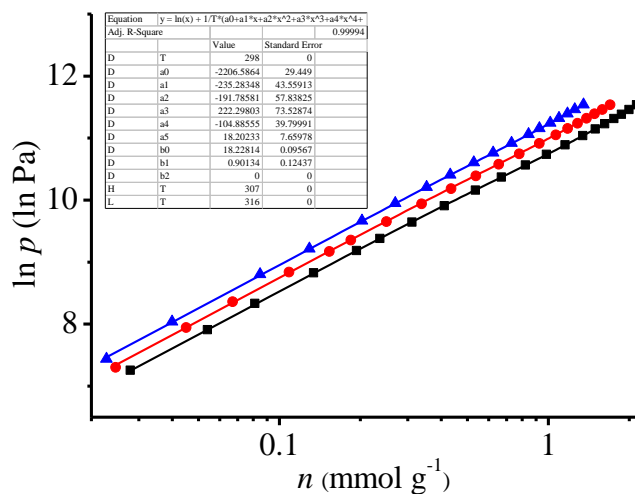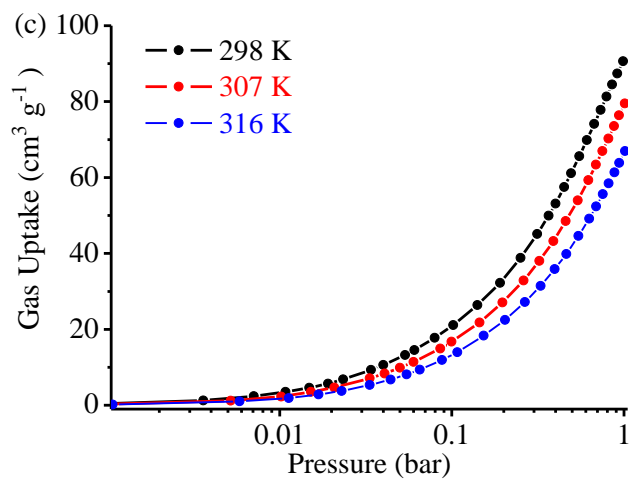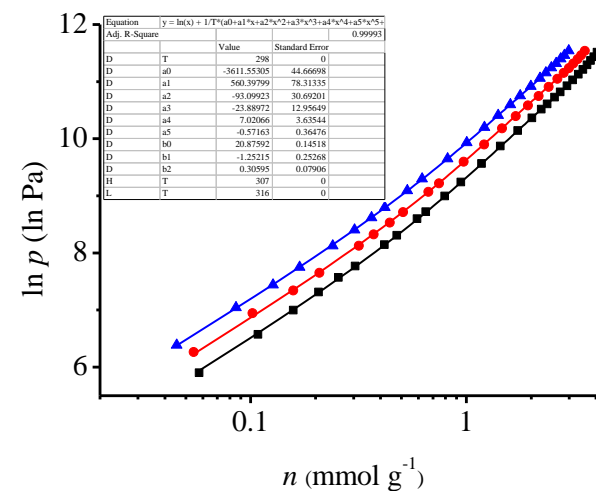

**Supplementary Figure 14.** The  $\text{C}_2\text{H}_6$  adsorption isotherms (left, lines are drawn to guide eyes) and Virial fitting (right, lines are fitting results) of (a) MAF-3, (b) MAF-4 and (c) IRMOF-8.

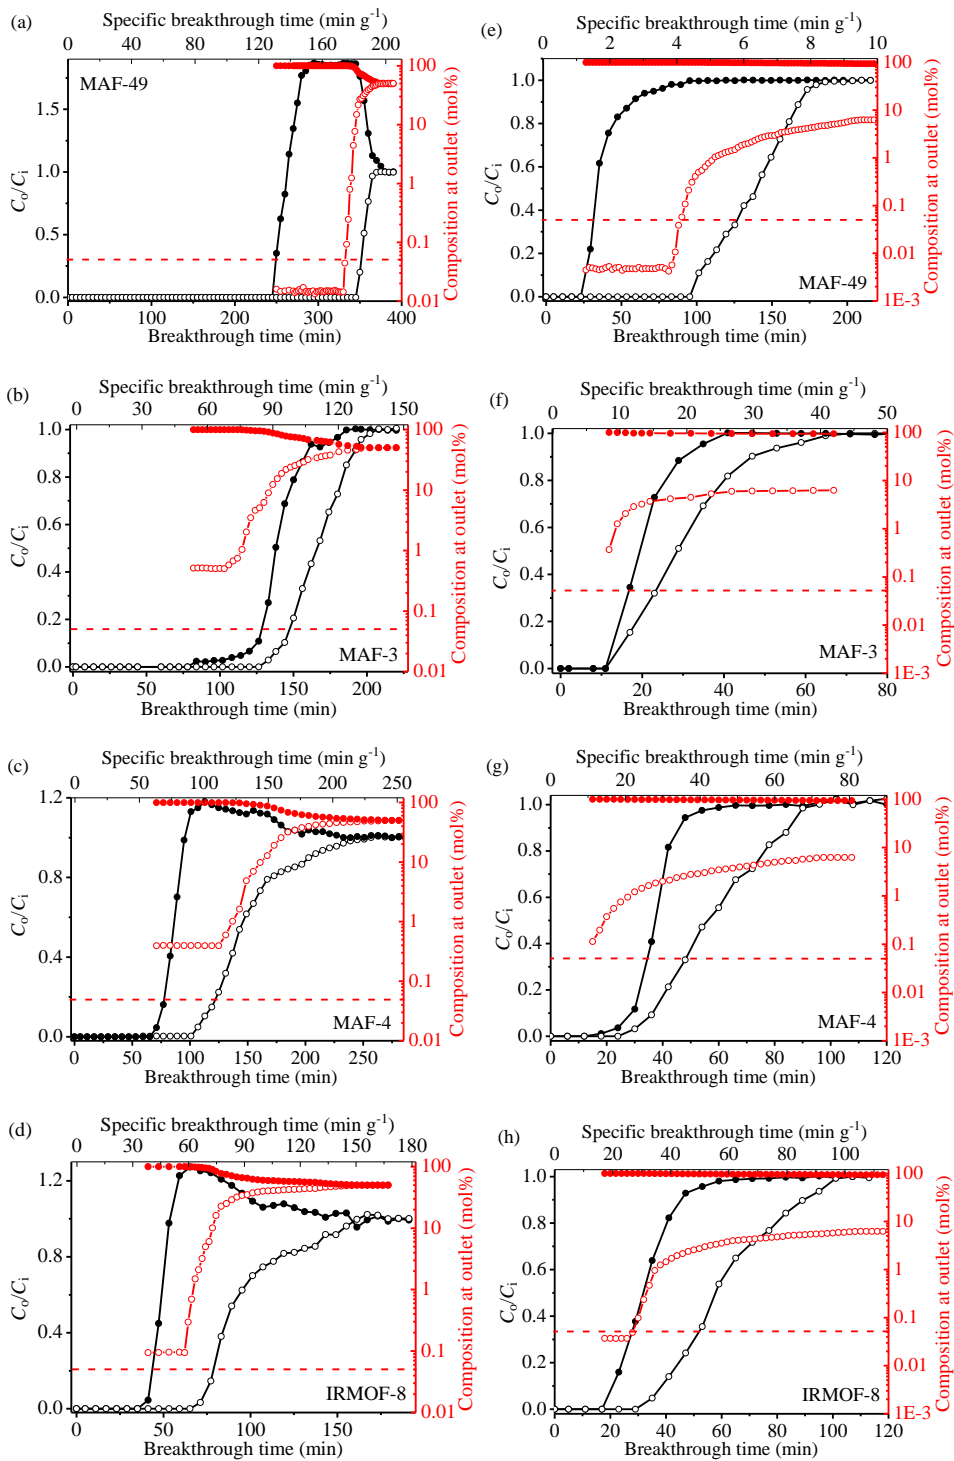

**Supplementary Figure 15.** Breakthrough curves of Figure 5 expressed using breakthrough time (min) and specific breakthrough time ( $\text{min g}^{-1}$ ) as abscissa.

Area Percent Report

Data Path : H:\LiaoPQ-GC-MS-20150526-R2\  
 Data File : MAF-49-1-1-C2H4-C2H6-MS-017.D  
 Acq On : 31 Mar 2015 20:58  
 Operator :  
 Sample :  
 Misc :  
 ALS Vial : 1 Sample Multiplier: 1

Integration Parameters: rteint.p  
 Integrator: RTE  
 Smoothing : ON Filtering: 5  
 Sampling : 1 Min Area: 3 % of largest Peak  
 Start Thrs: 0.2 Max Peaks: 100  
 Stop Thrs : 0 Peak Location: TOP

If leading or trailing edge < 100 prefer < Baseline drop else tangent >  
 Peak separation: 5

Method : E:\data\Jennifer\Flow through system\GC methods\5PAHs\_3Pesticides\_liquid injection\_splitless.M  
 Title :

Signal : EIC Ion 28.00 (27.70 to 28.70): MAF-49-1-1-C2H4-C2H6-MS-017.D\data.ms

| peak # | R.T. min | first scan | max scan | last scan | PK TY | peak height | corr. area | corr. % max | % of total |
|--------|----------|------------|----------|-----------|-------|-------------|------------|-------------|------------|
| 1      | 0.919    | 306        | 321      | 394       | rM 4  | 2402897     | 64363059   | 100.00%     | 100.000%   |

Sum of corrected areas: 64363059

Signal : EIC Ion 30.00 (29.70 to 30.70): MAF-49-1-1-C2H4-C2H6-MS-017.D\data.ms

| peak # | R.T. min | first scan | max scan | last scan | PK TY | peak height | corr. area | corr. % max | % of total |
|--------|----------|------------|----------|-----------|-------|-------------|------------|-------------|------------|
| 1      | 0.912    | 307        | 318      | 363       | rM 4  | 3536        | 9848       | 100.00%     | 100.000%   |

Sum of corrected areas: 9848

5PAHs\_3Pest...\_splitless.M Thu May 28 09:54:48 2015

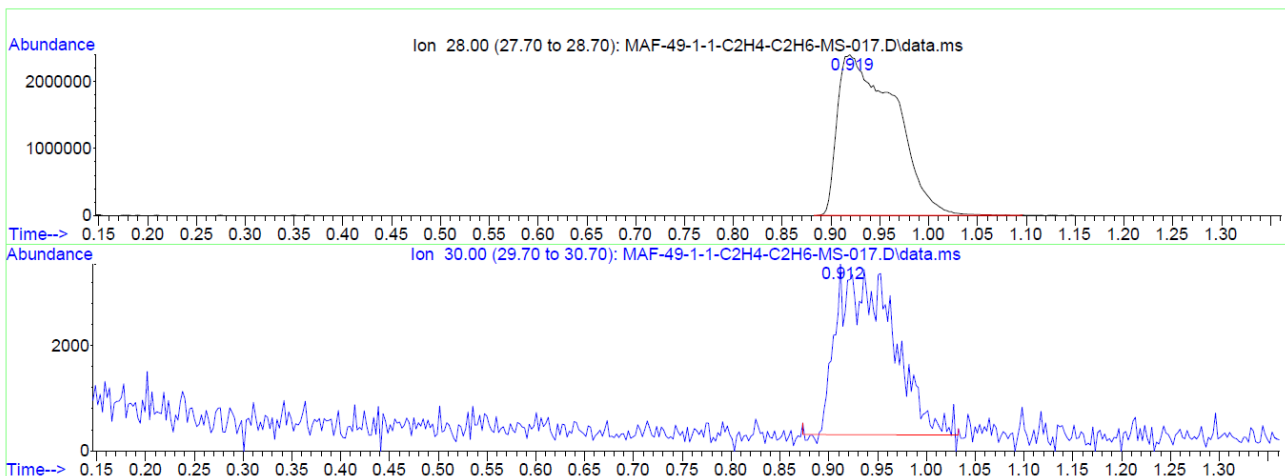

**Supplementary Figure 16.** GC-MS spectra of the outlet gas (top: C<sub>2</sub>H<sub>4</sub>, bottom C<sub>2</sub>H<sub>6</sub>) showing C<sub>2</sub>H<sub>4</sub> purity of 99.98% given by MAF-49 for a single breakthrough operation using 1:1 C<sub>2</sub>H<sub>4</sub>/C<sub>2</sub>H<sub>6</sub> as input.

Area Percent Report

Data Path : H:\LiaoPQ-GC-MS-20150526-R2\  
 Data File : MAF-3-1-1-C2H4-C2H6-010.D  
 Acq On : 3 Apr 2015 8:20  
 Operator :  
 Sample :  
 Misc :  
 ALS Vial : 1 Sample Multiplier: 1

Integration Parameters: rteint.p  
 Integrator: RTE  
 Smoothing : ON Filtering: 5  
 Sampling : 1 Min Area: 3 % of largest Peak  
 Start Thrs: 0.2 Max Peaks: 100  
 Stop Thrs : 0 Peak Location: TOP

If leading or trailing edge < 100 prefer < Baseline drop else tangent >  
 Peak separation: 5

Method : E:\data\Jennifer\Flow through system\GC methods\5PAHs\_3Pesticides\_liquid injection\_splitless.M  
 Title :

Signal : EIC Ion 28.00 (27.70 to 28.70): MAF-3-1-1-C2H4-C2H6-010.D\data.ms

| peak # | R.T. min | first scan | max scan | last scan | PK TY | peak height | corr. area | corr. % max | % of total |
|--------|----------|------------|----------|-----------|-------|-------------|------------|-------------|------------|
| 1      | 0.973    | 336        | 351      | 407       | rBV3  | 7522564     | 136112261  | 100.00%     | 100.000%   |

Sum of corrected areas: 136112261

Signal : EIC Ion 30.00 (29.70 to 30.70): MAF-3-1-1-C2H4-C2H6-010.D\data.ms

| peak # | R.T. min | first scan | max scan | last scan | PK TY | peak height | corr. area | corr. % max | % of total |
|--------|----------|------------|----------|-----------|-------|-------------|------------|-------------|------------|
| 1      | 0.973    | 340        | 351      | 376       | rVB3  | 47344       | 497102     | 100.00%     | 100.000%   |

Sum of corrected areas: 497102

5PAHs\_3Pest...\_splitless.M Thu May 28 10:01:32 2015

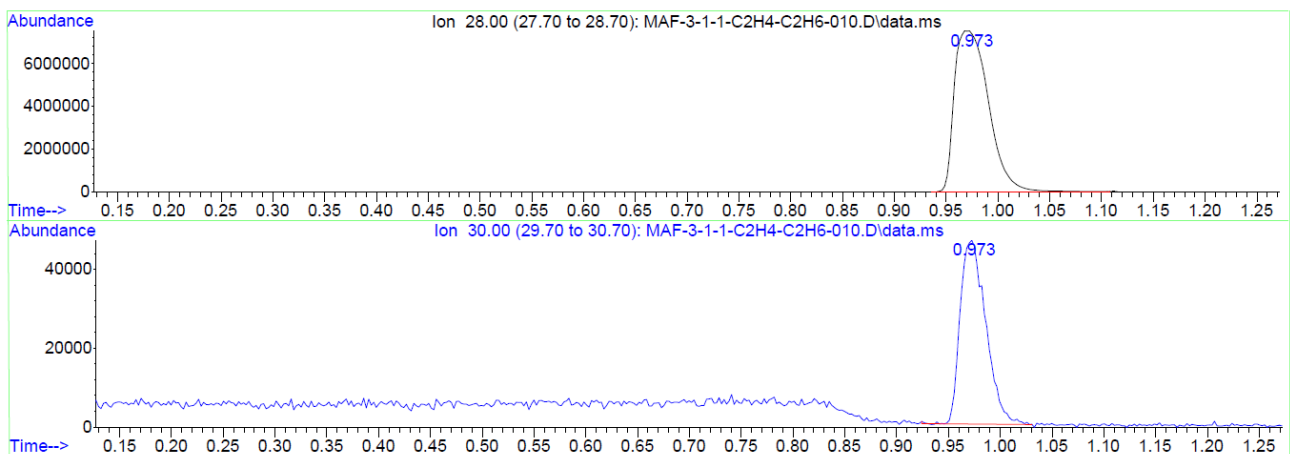

**Supplementary Figure 17.** GC-MS spectra of the outlet gas (top: C<sub>2</sub>H<sub>4</sub>, bottom C<sub>2</sub>H<sub>6</sub>) with C<sub>2</sub>H<sub>4</sub> purity of 99.5% given by MAF-3 for a single breakthrough operation using 1:1 C<sub>2</sub>H<sub>4</sub>/C<sub>2</sub>H<sub>6</sub> as input.

Area Percent Report

Data Path : H:\LiaoPQ-GC-MS-20150526-R2\  
 Data File : MAF-4-1-1-C2H4-C2H6-001.D  
 Acq On : 1 Apr 2015 17:34  
 Operator :  
 Sample :  
 Misc :  
 ALS Vial : 1 Sample Multiplier: 1

Integration Parameters: rteint.p  
 Integrator: RTE  
 Smoothing : ON Filtering: 5  
 Sampling : 1 Min Area: 3 % of largest Peak  
 Start Thrs: 0.2 Max Peaks: 100  
 Stop Thrs : 0 Peak Location: TOP

If leading or trailing edge < 100 prefer < Baseline drop else tangent >  
 Peak separation: 5

Method : E:\data\Jennifer\Flow through system\GC methods\5PAHs\_3Pesticides\_liquid injection\_splitless.M  
 Title :

Signal : EIC Ion 28.00 (27.70 to 28.70): MAF-4-1-1-C2H4-C2H6-001.D\data.ms

| peak # | R.T. min | first scan | max scan | last scan | PK TY | peak height | corr. area | corr. % max | % of total |
|--------|----------|------------|----------|-----------|-------|-------------|------------|-------------|------------|
| 1      | 0.965    | 329        | 347      | 389       | rM 5  | 3243520     | 44270812   | 100.00%     | 100.000%   |

Sum of corrected areas: 44270812

Signal : EIC Ion 30.00 (29.70 to 30.70): MAF-4-1-1-C2H4-C2H6-001.D\data.ms

| peak # | R.T. min | first scan | max scan | last scan | PK TY | peak height | corr. area | corr. % max | % of total |
|--------|----------|------------|----------|-----------|-------|-------------|------------|-------------|------------|
| 1      | 0.963    | 335        | 346      | 366       | rM 5  | 68997       | 142241     | 100.00%     | 100.000%   |

Sum of corrected areas: 142241

5PAHs\_3Pest...\_splitless.M Thu May 28 09:58:21 2015

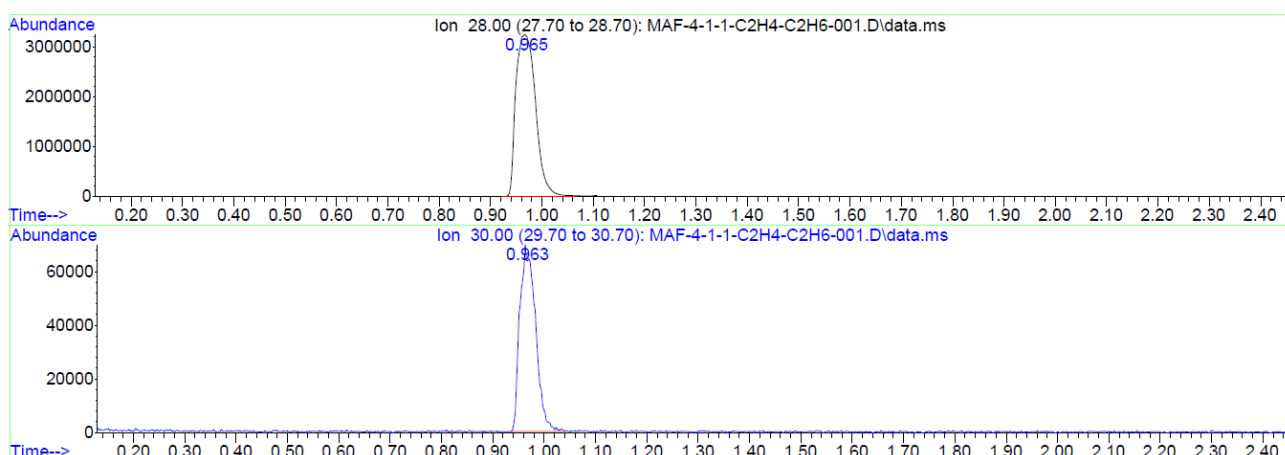

**Supplementary Figure 18.** GC-MS spectra of the outlet gas (top: C<sub>2</sub>H<sub>4</sub>, bottom C<sub>2</sub>H<sub>6</sub>) with C<sub>2</sub>H<sub>4</sub> purity of 99.6% given by MAF-4 for a single breakthrough operation using 1:1 C<sub>2</sub>H<sub>4</sub>/C<sub>2</sub>H<sub>6</sub> as input.

Area Percent Report

Data Path : H:\LiaoPQ-GC-MS-20150526-R2\  
 Data File : IRMOF-8-1-1-C2H4-C2H6-MS-05.D  
 Acq On : 31 Mar 2015 23:07  
 Operator :  
 Sample :  
 Misc :  
 ALS Vial : 1 Sample Multiplier: 1

Integration Parameters: rteint.p  
 Integrator: RTE  
 Smoothing : ON Filtering: 5  
 Sampling : 1 Min Area: 3 % of largest Peak  
 Start Thrs: 0.2 Max Peaks: 100  
 Stop Thrs : 0 Peak Location: TOP

If leading or trailing edge < 100 prefer < Baseline drop else tangent >  
 Peak separation: 5

Method : E:\data\Jennifer\Flow through system\GC methods\5PAHs\_3Pesticides\_liquid injection\_splitless.M  
 Title :

Signal : EIC Ion 28.00 (27.70 to 28.70): IRMOF-8-1-1-C2H4-C2H6-MS-05.D\data.ms

| peak # | R.T. min | first scan | max scan | last scan | PK TY | peak height | corr. area | corr. % max | % of total |
|--------|----------|------------|----------|-----------|-------|-------------|------------|-------------|------------|
| 1      | 0.884    | 288        | 308      | 423       | rM 4  | 6957820     | 549710224  | 100.00%     | 100.000%   |

Sum of corrected areas: 549710224

Signal : EIC Ion 30.00 (29.70 to 30.70): IRMOF-8-1-1-C2H4-C2H6-MS-05.D\data.ms

| peak # | R.T. min | first scan | max scan | last scan | PK TY | peak height | corr. area | corr. % max | % of total |
|--------|----------|------------|----------|-----------|-------|-------------|------------|-------------|------------|
| 1      | 0.892    | 297        | 311      | 370       | rM 4  | 10959       | 439160     | 100.00%     | 100.000%   |

Sum of corrected areas: 439160

5PAHs\_3Pest...\_splitless.M Thu May 28 10:00:05 2015

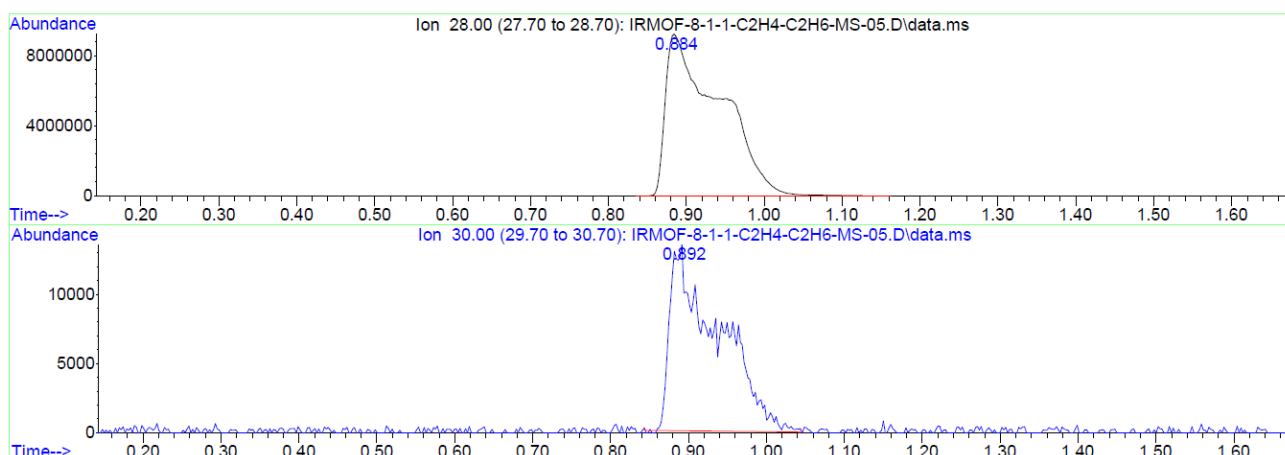

**Supplementary Figure 19.** GC-MS spectra of the outlet gas (top: C<sub>2</sub>H<sub>4</sub>, bottom C<sub>2</sub>H<sub>6</sub>) with C<sub>2</sub>H<sub>4</sub> purity of 99.9% given by IRMOF-8 for a single breakthrough operation using 1:1 C<sub>2</sub>H<sub>4</sub>/C<sub>2</sub>H<sub>6</sub> as input.



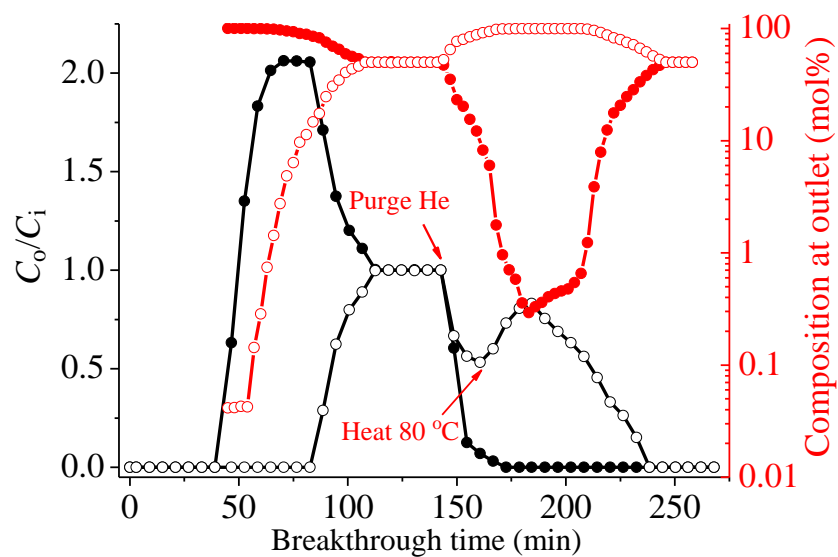

**Supplementary Figure 20.** Breakthrough curves of a complete adsorption-desorption cycle using 1:1 C<sub>2</sub>H<sub>4</sub>/C<sub>2</sub>H<sub>6</sub> mixture for MAF-49 (1.346 g sample was used, corresponding to an apparent density of 0.811 g cm<sup>-3</sup> a column voidage of 0.452; The mixed gas and He flow rates are both 0.6 cm<sup>3</sup> min<sup>-1</sup>). Solid symbols: C<sub>2</sub>H<sub>4</sub>, Open symbols: C<sub>2</sub>H<sub>6</sub>. Lines are drawn to guide eyes. C<sub>i</sub> and C<sub>o</sub> are the concentrations of each gas at the inlet and outlet, respectively.

Area Percent Report

Data Path : H:\LiaoPQ-GC-MS-20150526-R2\  
 Data File : MAF-49-15-1-C2H4-C2H6-011.D  
 Acq On : 4 Apr 2015 21:11  
 Operator :  
 Sample :  
 Misc :  
 ALS Vial : 1 Sample Multiplier: 1

Integration Parameters: rteint.p  
 Integrator: RTE  
 Smoothing : ON Filtering: 5  
 Sampling : 1 Min Area: 3 % of largest Peak  
 Start Thrs: 0.2 Max Peaks: 100  
 Stop Thrs : 0 Peak Location: TOP

If leading or trailing edge < 100 prefer < Baseline drop else tangent >  
 Peak separation: 5

Method : E:\data\Jennifer\Flow throught system\GC methods\5PAHs\_3Pesticides\_liquid injection\_splitless.M  
 Title :

Signal : EIC Ion 28.00 (27.70 to 28.70): MAF-49-15-1-C2H4-C2H6-011.D\data.ms

| peak # | R.T. min | first scan | max scan | last scan | PK TY | peak height | corr. area | corr. % | % of max. | % of total |
|--------|----------|------------|----------|-----------|-------|-------------|------------|---------|-----------|------------|
| 1      | 0.971    | 319        | 343      | 384       | rM 2  | 4851775     | 135146886  | 100.00% | 100.000%  |            |

Sum of corrected areas: 135146886

Signal : EIC Ion 30.00 (29.70 to 30.70): MAF-49-15-1-C2H4-C2H6-011.D\data.ms

| peak # | R.T. min | first scan | max scan | last scan | PK TY | peak height | corr. area | corr. % | % of max. | % of total |
|--------|----------|------------|----------|-----------|-------|-------------|------------|---------|-----------|------------|
| 1      | 0.971    | 320        | 343      | 365       | rM 2  | 2723        | 5575       | 100.00% | 100.000%  |            |

Sum of corrected areas: 5575

5PAHs\_3Pest...\_splitless.M Thu May 28 10:10:31 2015

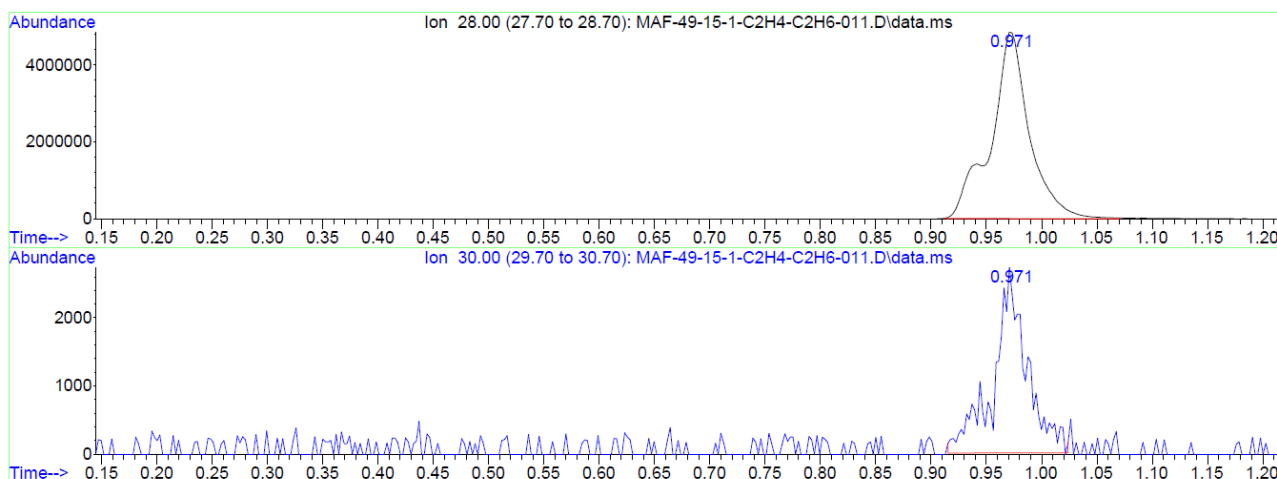

**Supplementary Figure 21.** GC-MS spectra of the outlet gas (top: C<sub>2</sub>H<sub>4</sub>, bottom C<sub>2</sub>H<sub>6</sub>) with C<sub>2</sub>H<sub>4</sub> purity of 99.995% given by MAF-49 for a single breakthrough operation using 15:1 C<sub>2</sub>H<sub>4</sub>/C<sub>2</sub>H<sub>6</sub> as input.

Area Percent Report

Data Path : H:\LiaoPQ-GC-MS-20150526-R2\  
 Data File : MAF-3-15-1-C2H4-C2H6-013.D  
 Acq On : 5 Apr 2015 9:02  
 Operator :  
 Sample :  
 Misc :  
 ALS Vial : 1 Sample Multiplier: 1

Integration Parameters: rteint.p  
 Integrator: RTE  
 Smoothing : ON Filtering: 5  
 Sampling : 1 Min Area: 3 % of largest Peak  
 Start Thrs: 0.2 Max Peaks: 100  
 Stop Thrs : 0 Peak Location: TOP

If leading or trailing edge < 100 prefer < Baseline drop else tangent >  
 Peak separation: 5

Method : E:\data\Jennifer\Flow through system\GC methods\5PAHs\_3Pesticides\_liquid injection\_splitless.M  
 Title :

Signal : EIC Ion 28.00 (27.70 to 28.70): MAF-3-15-1-C2H4-C2H6-013.D\data.ms

| peak # | R.T. min | first scan | max scan | last scan | PK TY | peak height | corr. area | corr. % max | % of total |
|--------|----------|------------|----------|-----------|-------|-------------|------------|-------------|------------|
| 1      | 0.989    | 339        | 351      | 400       | rBV2  | 291584      | 2571186    | 100.00%     | 100.000%   |

Sum of corrected areas: 2571186

Signal : EIC Ion 30.00 (29.70 to 30.70): MAF-3-15-1-C2H4-C2H6-013.D\data.ms

| peak # | R.T. min | first scan | max scan | last scan | PK TY | peak height | corr. area | corr. % max | % of total |
|--------|----------|------------|----------|-----------|-------|-------------|------------|-------------|------------|
| 1      | 0.989    | 343        | 351      | 374       | rM 2  | 5191        | 8602       | 100.00%     | 100.000%   |

Sum of corrected areas: 8602

5PAHs\_3Pest...\_splitless.M Thu May 28 10:04:43 2015

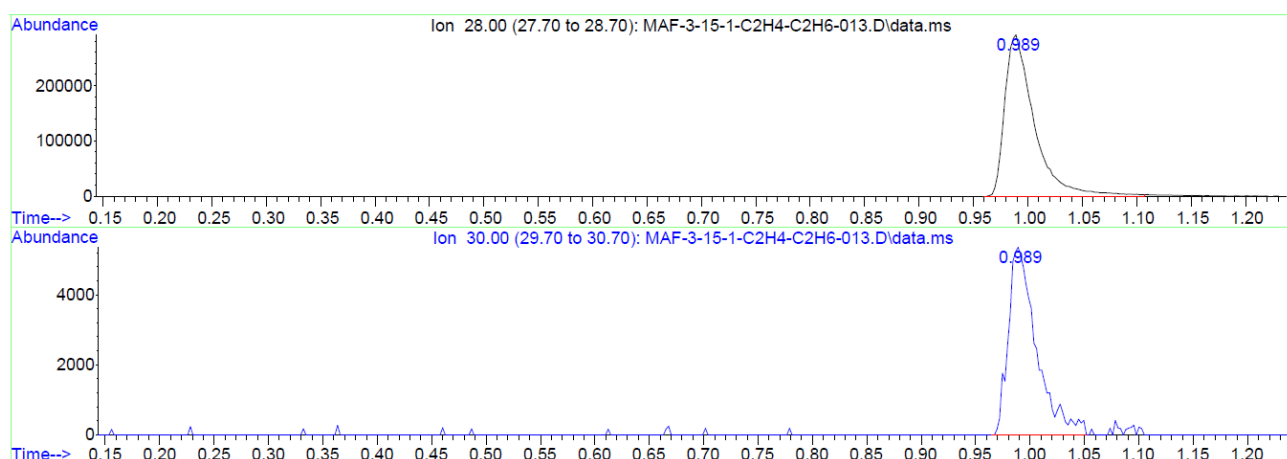

**Supplementary Figure 22.** GC-MS spectra of the outlet gas (top: C<sub>2</sub>H<sub>4</sub>, bottom C<sub>2</sub>H<sub>6</sub>) with C<sub>2</sub>H<sub>4</sub> purity of 99.6% given by MAF-3 for a single breakthrough operation using 15:1 C<sub>2</sub>H<sub>4</sub>/C<sub>2</sub>H<sub>6</sub> as input.

Area Percent Report

Data Path : H:\LiaoPQ-GC-MS-20150526-R2\  
Data File : MAF-4-15-1-C2H4-C2H6-011.D  
Acq On : 5 Apr 2015 8:57  
Operator :  
Sample :  
Misc :  
ALS Vial : 1 Sample Multiplier: 1

Integration Parameters: rteint.p  
Integrator: RTE  
Smoothing : ON Filtering: 5  
Sampling : 1 Min Area: 3 % of largest Peak  
Start Thrs: 0.2 Max Peaks: 100  
Stop Thrs : 0 Peak Location: TOP

If leading or trailing edge < 100 prefer < Baseline drop else tangent >  
Peak separation: 5

Method : E:\data\Jennifer\Flow through system\GC methods\5PAHs\_3Pesticides\_liquid injection\_splitless.M  
Title :

Signal : EIC Ion 28.00 (27.70 to 28.70): MAF-4-15-1-C2H4-C2H6-011.D\data.ms

| peak # | R.T. min | first scan | max scan | last scan | PK TY | peak height | corr. area | corr. % max | % of total |
|--------|----------|------------|----------|-----------|-------|-------------|------------|-------------|------------|
| 1      | 0.995    | 347        | 359      | 449       | rM 2  | 4881389     | 22194158   | 100.00%     | 100.000%   |

Sum of corrected areas: 22194158

Signal : EIC Ion 30.00 (29.70 to 30.70): MAF-4-15-1-C2H4-C2H6-011.D\data.ms

| peak # | R.T. min | first scan | max scan | last scan | PK TY | peak height | corr. area | corr. % max | % of total |
|--------|----------|------------|----------|-----------|-------|-------------|------------|-------------|------------|
| 1      | 0.997    | 349        | 360      | 383       | rM 2  | 6935        | 12090      | 100.00%     | 100.000%   |

Sum of corrected areas: 12090

5PAHs\_3Pest...\_splitless.M Thu May 28 10:05:27 2015

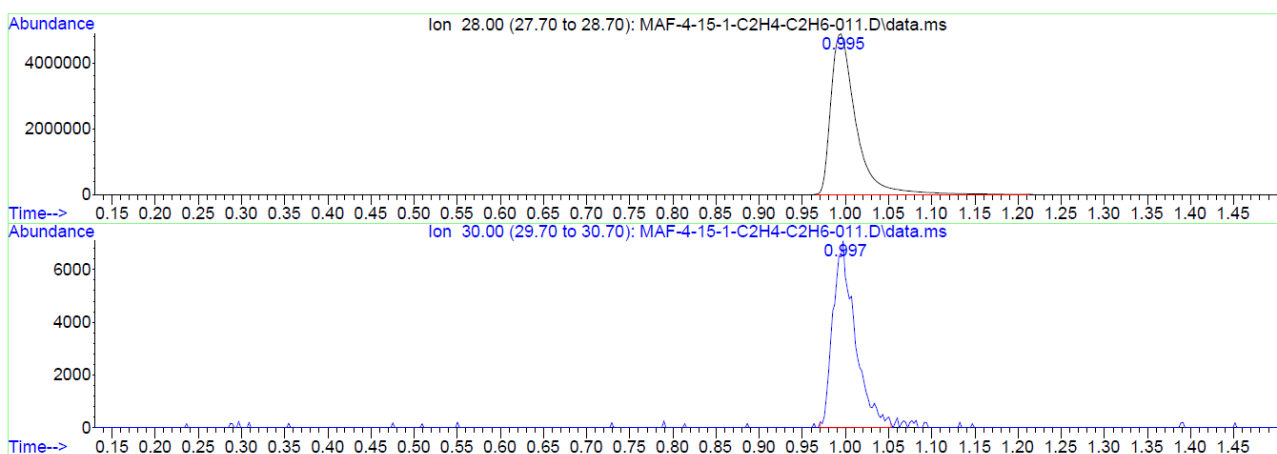

**Supplementary Figure 23.** GC-MS spectra of the outlet gas (top: C<sub>2</sub>H<sub>4</sub>, bottom C<sub>2</sub>H<sub>6</sub>) with C<sub>2</sub>H<sub>4</sub> purity of 99.9% given by MAF-4 for a single breakthrough operation using 15:1 C<sub>2</sub>H<sub>4</sub>/C<sub>2</sub>H<sub>6</sub> as input.

Area Percent Report

Data Path : H:\LiaoPQ-GC-MS-20150526-R2\  
 Data File : IRMOF-8-15-1-C2H4-C2H6-MS-009.D  
 Acq On : 31 Mar 2015 20:39  
 Operator :  
 Sample :  
 Misc :  
 ALS Vial : 1 Sample Multiplier: 1

Integration Parameters: rteint.p  
 Integrator: RTE  
 Smoothing : ON Filtering: 5  
 Sampling : 1 Min Area: 3 % of largest Peak  
 Start Thrs: 0.2 Max Peaks: 100  
 Stop Thrs : 0 Peak Location: TOP

If leading or trailing edge < 100 prefer < Baseline drop else tangent >  
 Peak separation: 5

Method : E:\data\Jennifer\Flow through system\GC methods\5PAHs\_3Pesticides\_liquid injection\_splitless.M  
 Title :

Signal : EIC Ion 28.00 (27.70 to 28.70): IRMOF-8-15-1-C2H4-C2H6-MS-009.D\data.ms

| peak # | R.T. min | first scan | max scan | last scan | PK TY | peak height | corr. area | corr. % max | % of total |
|--------|----------|------------|----------|-----------|-------|-------------|------------|-------------|------------|
| 1      | 0.929    | 319        | 332      | 410       | rM 4  | 2778384     | 76935635   | 100.00%     | 100.000%   |

Sum of corrected areas: 76935635

Signal : EIC Ion 30.00 (29.70 to 30.70): IRMOF-8-15-1-C2H4-C2H6-MS-009.D\data.ms

| peak # | R.T. min | first scan | max scan | last scan | PK TY | peak height | corr. area | corr. % max | % of total |
|--------|----------|------------|----------|-----------|-------|-------------|------------|-------------|------------|
| 1      | 0.948    | 316        | 340      | 372       | rM 4  | 12216       | 26104      | 100.00%     | 100.000%   |

Sum of corrected areas: 26104

5PAHs\_3Pest...\_splitless.M Thu May 28 10:07:29 2015

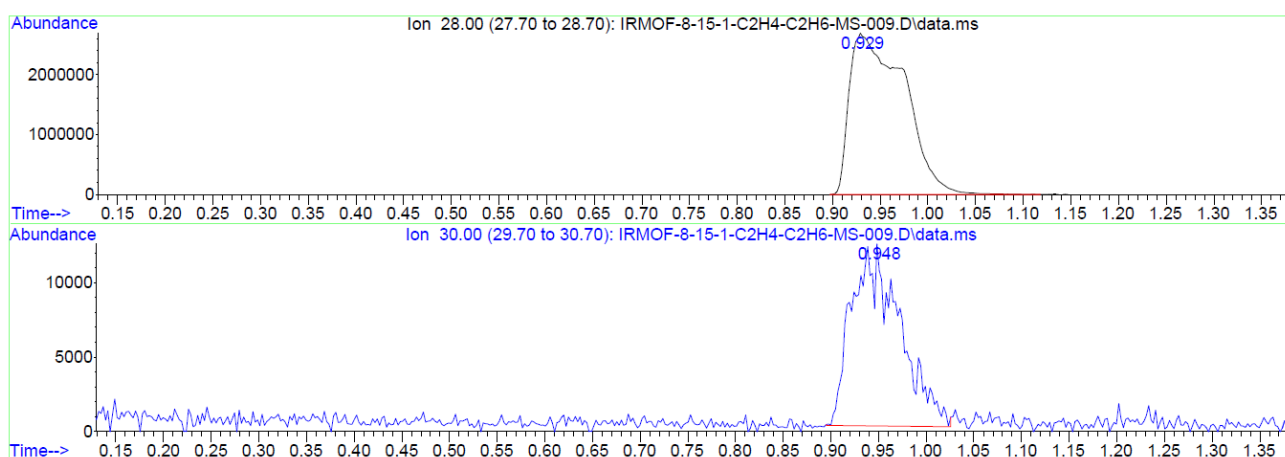

**Supplementary Figure 24.** GC-MS spectra of the outlet gas (top: C<sub>2</sub>H<sub>4</sub>, bottom C<sub>2</sub>H<sub>6</sub>) with C<sub>2</sub>H<sub>4</sub> purity of 99.96% given by IRMOF-8 for a single breakthrough operation using 15:1 C<sub>2</sub>H<sub>4</sub>/C<sub>2</sub>H<sub>6</sub> as input.

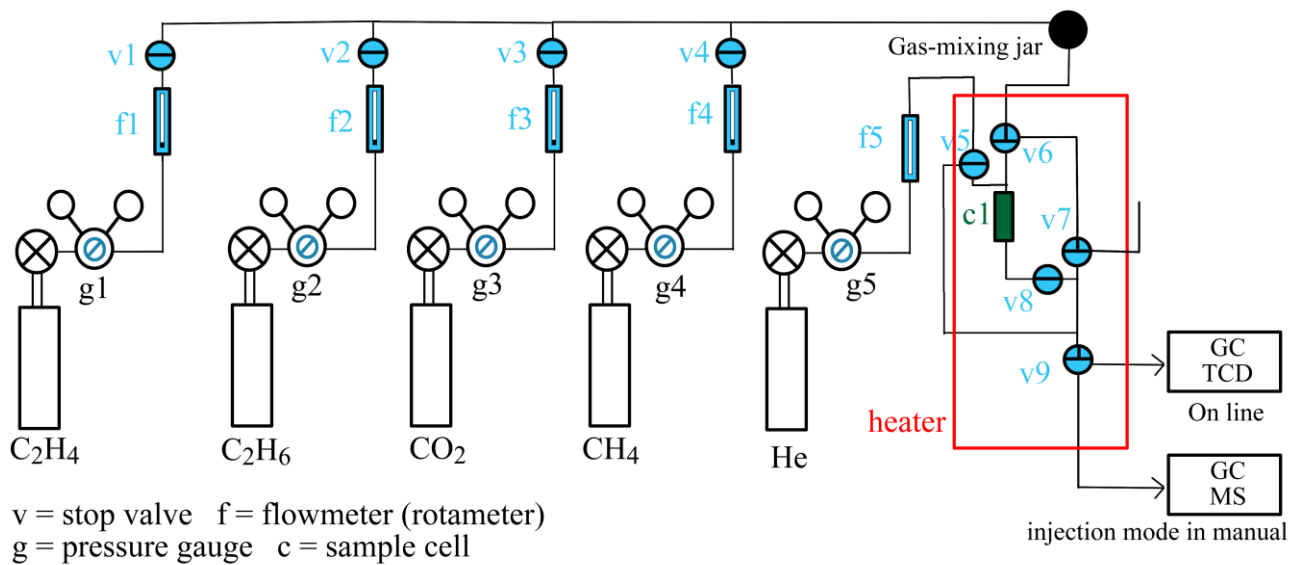

**Supplementary Figure 25.** The column breakthrough experiment setup.

**Supplementary Table 1.** Physical parameters of CO<sub>2</sub>, C<sub>2</sub>H<sub>6</sub> and CH<sub>4</sub><sup>4,5</sup>.

|                                                           | CO <sub>2</sub> | CH <sub>4</sub> | C <sub>2</sub> H <sub>6</sub> | C <sub>2</sub> H <sub>4</sub> |
|-----------------------------------------------------------|-----------------|-----------------|-------------------------------|-------------------------------|
| Kinetic diameter (Å)                                      | 3.3             | 3.758           | 4.443                         | 4.163                         |
| Polarizability ( $\times 10^{25}$ cm <sup>3</sup> )       | 29.11           | 25.93           | 44.3-44.7                     | 42.52                         |
| Quadruple moment ( $\times 10^{26}$ esu cm <sup>2</sup> ) | 4.30            | 0               | 0.65                          | 1.50                          |
| Boiling point (K)                                         | 194.75          | 111.6           | 184.55                        | 169.42                        |

**Supplementary Table 2.** Crystal Data and Structure Refinement results.

| Complex                                            | MAF-49                                          | MAF-49·H <sub>2</sub> O                                          | MAF-49·C <sub>2</sub> H <sub>4</sub>                  | MAF-49·CO <sub>2</sub>                                               | MAF-49·C <sub>2</sub> H <sub>6</sub>               |
|----------------------------------------------------|-------------------------------------------------|------------------------------------------------------------------|-------------------------------------------------------|----------------------------------------------------------------------|----------------------------------------------------|
| Formula                                            | C <sub>5</sub> H <sub>6</sub> N <sub>8</sub> Zn | C <sub>5</sub> H <sub>7</sub> N <sub>8</sub> O <sub>0.5</sub> Zn | C <sub>5.78</sub> H <sub>7.56</sub> N <sub>8</sub> Zn | C <sub>5.14</sub> H <sub>6</sub> N <sub>8</sub> O <sub>0.27</sub> Zn | C <sub>5.67</sub> H <sub>8</sub> N <sub>8</sub> Zn |
| Formula weight                                     | 243.57                                          | 252.56                                                           | 254.50                                                | 249.56                                                               | 253.62                                             |
| Temperature (K)                                    | 195(2)                                          | 195(2)                                                           | 195(2)                                                | 195(2)                                                               | 195(2)                                             |
| Space group                                        | <i>P</i> 3 <sub>1</sub> 21                      | <i>P</i> 3 <sub>1</sub> 21                                       | <i>P</i> 3 <sub>1</sub> 21                            | <i>P</i> 3 <sub>1</sub> 21                                           | <i>P</i> 3 <sub>1</sub> 21                         |
| <i>a</i> /Å                                        | 9.6963(15)                                      | 9.6767(14)                                                       | 9.6896(16)                                            | 9.7682(15)                                                           | 9.663(3)                                           |
| <i>c</i> /Å                                        | 20.126(3)                                       | 20.172(3)                                                        | 20.153(4)                                             | 20.100(4)                                                            | 20.224(5)                                          |
| <i>V</i> /Å <sup>3</sup>                           | 1638.7(4)                                       | 1635.8(4)                                                        | 1638.6(5)                                             | 1660.9(5)                                                            | 1635.2(8)                                          |
| <i>Z</i>                                           | 6                                               | 6                                                                | 6                                                     | 6                                                                    | 6                                                  |
| <i>D<sub>c</sub></i> /g cm <sup>-3</sup>           | 1.481                                           | 1.538                                                            | 1.547                                                 | 1.499                                                                | 1.550                                              |
| <i>R</i> <sub>int</sub>                            | 0.0192                                          | 0.0340                                                           | 0.0254                                                | 0.0393                                                               | 0.0529                                             |
| <i>R</i> <sub>1</sub> [ <i>I</i> > 2σ( <i>I</i> )] | 0.0184                                          | 0.0369                                                           | 0.0337                                                | 0.0422                                                               | 0.0448                                             |
| <i>wR</i> <sub>2</sub> (all data)                  | 0.0438                                          | 0.0994                                                           | 0.1028                                                | 0.1313                                                               | 0.1203                                             |
| GOF                                                | 1.060                                           | 1.051                                                            | 1.059                                                 | 1.052                                                                | 1.008                                              |
| Flack                                              | 0.003(10)                                       | -0.02(2)                                                         | -0.01(2)                                              | -0.01(3)                                                             | -0.02(3)                                           |
| Peak and hole (e Å <sup>-3</sup> )                 | 0.293 and<br>-0.249                             | 0.579 and -0.405                                                 | 0.986 and -0.368                                      | 1.281 and -0.423                                                     | 0.656 and -0.633                                   |

$$R_1 = \sum ||F_o| - |F_c|| / \sum |F_o|. \quad wR_2 = [\sum w(F_o^2 - F_c^2)^2 / \sum w(F_o^2)^2]^{1/2}.$$

**Supplementary Table 3.** Comparison for the binding energies between adsorption isotherms and GCMC/PDFT simulations.

| Compound                             | From adsorption isotherms<br>(kJ mol <sup>-1</sup> ) | From GCMC/PDFT simulation<br>(kJ mol <sup>-1</sup> ) |
|--------------------------------------|------------------------------------------------------|------------------------------------------------------|
| MAF-49·CO <sub>2</sub>               | 30                                                   | 31                                                   |
| MAF-49·C <sub>2</sub> H <sub>4</sub> | 48                                                   | 47                                                   |
| MAF-49·C <sub>2</sub> H <sub>6</sub> | 60                                                   | 56                                                   |



**Supplementary Table 4.** The interactions between the gas molecules and host framework in MAF-49.

| C <sub>2</sub> H <sub>6</sub> |           |           | C <sub>2</sub> H <sub>4</sub> |              |       | CO <sub>2</sub> |          |                |       |       |          |
|-------------------------------|-----------|-----------|-------------------------------|--------------|-------|-----------------|----------|----------------|-------|-------|----------|
|                               | D...A     | H...A     | ∠D-H...A                      |              | D...A | H...A           | ∠D-H...A |                | D...A | H...A | ∠D-H...A |
|                               | (Å)       | (Å)       | (°)                           |              | (Å)   | (Å)             | (°)      |                | (Å)   | (Å)   | (°)      |
| C6-H61...N8                   | 3.23      | 2.15      | 168                           |              |       |                 |          | C6...N8        | 2.91  |       |          |
| C7-H71...N1A                  | 3.47      | 2.40      | 162                           | C6-H61...N8  | 3.58  | 2.54            | 161      | C6...N8A       | 2.91  |       |          |
| C6-H62...N8A/N3A              | 2.86/3.38 | 2.15/2.70 | 120/120                       | C7-H71...N2A | 3.57  | 2.65            | 142      | C3-H31...O1    | 3.34  | 2.46  | 135      |
| C6-H63...N2                   | 4.15      | 3.26      | 140                           |              |       |                 |          | C3A-H31A...O1A | 3.34  | 2.46  | 135      |
| C7-H72...N6B                  | 4.59      | 3.59      | 152                           | C6-H62...N6  | 5.20  | 4.41            | 134      |                |       |       |          |
| C7-H73...N4C                  | 5.05      | 4.03      | 155                           | C7-H71...N3  | 6.51  | 5.52            | 154      |                |       |       |          |

Symmetric codes: A = 1+x-y, 2-y, 0.6667-z; B = 1+x-y, 1-y, 0.6667-z; C = -1-x+y, 1-x, -0.33333+z; D = x-y, 1-y, 0.6667-z.

**Supplementary Table 5.** Comparing the parameters of the breakthrough columns studied in this work.

| Materials | Sample weight<br>(g) | Crystal density<br>(g cm <sup>-3</sup> ) | Apparent density<br>(g cm <sup>-3</sup> ) | Column voidage | Column free space<br>(cm <sup>3</sup> ) |
|-----------|----------------------|------------------------------------------|-------------------------------------------|----------------|-----------------------------------------|
| MAF-49    | 1.873                | 1.481                                    | 1.128                                     | 0.238          | 0.395                                   |
| IRMOF-8   | 1.063                | 0.896                                    | 0.640                                     | 0.285          | 0.474                                   |
| MAF-4     | 1.316                | 1.067                                    | 0.793                                     | 0.257          | 0.427                                   |
| MAF-3     | 1.472                | 1.241                                    | 0.887                                     | 0.285          | 0.473                                   |
| HKUST-1   | 1.119                | 0.879                                    | 0.674                                     | 0.233          | 0.387                                   |
| MOF-74-Mg | 1.147                | 0.920                                    | 0.691                                     | 0.249          | 0.413                                   |
| MOF-74-Co | 1.374                | 1.170                                    | 0.827                                     | 0.293          | 0.485                                   |
| UiO-66    | 1.531                | 1.198                                    | 0.922                                     | 0.230          | 0.382                                   |

Apparent density = Sample weight / Column volume

Column voidage = 1 - Sample weight / Crystal density / Column volume

Column free space = Column volume × Column voidage

**Supplementary Table 6.** Comparing the C<sub>2</sub>H<sub>4</sub> productivities of C<sub>2</sub>H<sub>6</sub> selective adsorbents for a single breakthrough operation using 1:1 C<sub>2</sub>H<sub>4</sub>/C<sub>2</sub>H<sub>6</sub> as input.

|           |                                       | Gravimetric/Volumetric productivity (mmol g <sup>-1</sup> /mmol cm <sup>-3</sup> ) with different purities |             |           |
|-----------|---------------------------------------|------------------------------------------------------------------------------------------------------------|-------------|-----------|
| Materials | Crystal density (g cm <sup>-3</sup> ) | 99.95%+                                                                                                    | 99.5%+      | 99%+      |
| MAF-49    | 1.480                                 | 0.28/0.42                                                                                                  | 0.30/0.45   | 0.32/0.47 |
| IRMOF-8   | 0.896                                 | 0/0                                                                                                        | 0.05/0.04   | 0.11/0.10 |
| MAF-4     | 1.067                                 | 0/0                                                                                                        | 0.02/0.02   | 0.03/0.03 |
| MAF-3     | 1.241                                 | 0/0                                                                                                        | 0.004/0.005 | 0.01/0.01 |

**Supplementary Table 7.** Comparing the C<sub>2</sub>H<sub>4</sub> productivities of C<sub>2</sub>H<sub>6</sub> selective adsorbents for a single breakthrough operation using 15:1 C<sub>2</sub>H<sub>4</sub>/C<sub>2</sub>H<sub>6</sub> as input.

|           |                                       | Gravimetric/Volumetric productivity (mmol g <sup>-1</sup> /mmol cm <sup>-3</sup> ) with different purities |           |             |             |
|-----------|---------------------------------------|------------------------------------------------------------------------------------------------------------|-----------|-------------|-------------|
| Materials | Crystal density (g cm <sup>-3</sup> ) | 99.995%+                                                                                                   | 99.95%+   | 99.5%+      | 99%+        |
| MAF-49    | 1.480                                 | 1.48/2.17                                                                                                  | 1.68/2.48 | 2.07/2.97   | 2.46/3.70   |
| IRMOF-8   | 0.896                                 | 0/0                                                                                                        | 0.06/0.05 | 0.15/0.13   | 0.22/0.21   |
| MAF-4     | 1.067                                 | 0/0                                                                                                        | 0/0       | 0.004/0.004 | 0.015/0.016 |
| MAF-3     | 1.241                                 | 0/0                                                                                                        | 0/0       | 0.001/0.001 | 0.006/0.008 |

## Supplementary Methods.

### Calculations of adsorption enthalpies

The coverage-dependent adsorption enthalpy profiles were calculated from the sorption data measured at 298, 307 and 316 K by the Virial fitting method and Clausius-Claperyron equation.

**Virial fitting:** A Virial-type expression was used (eq. 1), which is composed of parameters  $a_i$  and  $b_i$ , which are independent of temperature. In eq. 1,  $P$  is the pressure in atm,  $N$  is the adsorbed amount in mmol g<sup>-1</sup>,  $T$  is the temperature in Kelvin,  $a_i$  and  $b_i$  are the Virial coefficients, and  $m$  and  $n$  represent the numbers of coefficients required to adequately describe the isotherms.

$$\ln p = \ln n + \frac{1}{T} \sum_{i=0}^l a_i n^i + \sum_{j=0}^m b_j n^j \quad (1)$$

$$K_H = \exp(-b_0) \times \exp\left(\frac{-a_0}{T}\right) \quad (2)$$

The adsorption enthalpy ( $\Delta H$ ) is obtained from the following equation derived from the Clausius-Clapeyron equation (eq. 3).

$$Q_{st} = -R \left[ \frac{\partial \ln p}{\partial (1/T)} \right]_n = -R \sum_{i=0}^l a_i n^i \quad (3)$$

### Breakthrough measurements.

A stainless-steel column with a length of 10 cm and an internal diameter of 0.46 cm ( $V_{\text{column}} = 0.23 \times 0.23 \times 3.14 \times 10.0 = 1.66 \text{ cm}^3$ ) was packed with microcrystalline sample. The sample in each column was compressed as much as possible to obtain the best separation performance, and column voidages are similar for different samples. As shown in the above scheme, the column was connected to the GC by stainless-steel pipes with a combined length of 40 cm and an internal diameter of 0.30 cm ( $V_{\text{tube}} = 0.150 \times 0.150 \times 3.14 \times 40 = 2.84 \text{ cm}^3$ ). The column and most parts of the pipelines between the injection and sampling ports were placed in a temperature-controlling oven. The flow rates (cm<sup>3</sup> min<sup>-1</sup> at 298.15 K and 1 bar) of pure gases were regulated by mass flow controllers. Before breakthrough experiments, the columns were heated at 323 K for 10 hours and then cooled to the measurement temperature of 313(1) K, during which pure He flow (2.0 cm<sup>3</sup> min<sup>-1</sup>) was kept passing through the columns. Pure gases were mixed by passing through the gas-mixing jar and then used

directly. Except otherwise specified, the mixed gas flow rates are 0.8, 0.2, and 1.6 cm<sup>3</sup> min<sup>-1</sup> for the breakthrough operations using 1:1:1:1 CH<sub>4</sub>/CO<sub>2</sub>/C<sub>2</sub>H<sub>4</sub>/C<sub>2</sub>H<sub>6</sub>, 1:1 C<sub>2</sub>H<sub>4</sub>/C<sub>2</sub>H<sub>6</sub>, and 15:1 C<sub>2</sub>H<sub>4</sub>/C<sub>2</sub>H<sub>6</sub> as inputs, respectively. The gas stream at the outlet of the column was analyzed on line by using a chromatographic analyzer (Agilent 7890A) with a thermal conductivity detector (TCD) and an HP-AL/S column or an Agilent 5975C Mass Spectrometer (MS) with the injection mode in manual.

Absolute and relative concentrations of each gas at the inlet and outlet are expressed by molar ratio. To compare the performances of different materials unambiguously, the specific injection amount  $\tau$  (mmol g<sup>-1</sup>) was used as the abscissa, meaning that the breakthrough time (min) was not only divided by the adsorbent weight (g) but also multiplied by the flow rate of the injection gas (mmol min<sup>-1</sup>). For comparison, breakthrough curves using breakthrough time (min) and specific breakthrough time (min g<sup>-1</sup>) as abscissa were also provided in the supplementary information.

The breakthrough curves were expressed by

$$f(\tau) = \frac{C_o(j, \tau)}{C_i(j)} \quad (4)$$

Where  $C_o(j, \tau)$  is the TCD peak area of gas  $j$  at the outlet at  $\tau$  and  $C_i(j)$  is the TCD peak area of gas  $j$  at the inlet (not change with  $\tau$ ). The purity of gas  $j$  (*i.e.* the molar ratio of gas  $j$  in the outlet gas mixture containing  $n$  types of gases) can be expressed by

$$g(\tau) = \frac{C_o(j, \tau)}{\sum_{j=1}^n C_o(j, \tau)} \times 100\% \quad (5)$$

To achieve a sufficient resolution for GC capillary column before TCD analyses, the outlet gas analytes need to be diluted by large amounts of protective gas He. Therefore, gas  $j$  could not be detected by TCD when the  $g(\tau)$  is lower than about 1%. To obtain the accurate concentrations and purities for the C<sub>2</sub>H<sub>4</sub>/C<sub>2</sub>H<sub>6</sub> breakthrough experiments, the MS peak areas of C<sub>2</sub>H<sub>4</sub> and C<sub>2</sub>H<sub>6</sub> were used, in which the C<sub>2</sub>H<sub>4</sub> purity was expressed by

$$g(\tau) = \frac{M_o(\text{C}_2\text{H}_4, \tau)}{M_o(\text{C}_2\text{H}_4, \tau) + M_o(\text{C}_2\text{H}_6, \tau) / 0.8} \times 100\% \quad (6)$$

Where  $M_o(\text{C}_2\text{H}_4, \tau)$  and  $M_o(\text{C}_2\text{H}_6, \tau)$  are the MS peak areas of C<sub>2</sub>H<sub>4</sub> and C<sub>2</sub>H<sub>6</sub> at  $\tau$ , respectively.

The  $C_2H_4$  productivity ( $q$ ) is defined by the breakthrough amount of  $C_2H_4$ , which is calculated by integration of the breakthrough curve  $f(\tau)$  during a period from  $\tau_1$  to  $\tau_2$  where the  $C_2H_4$  purity is higher than or equal to a threshold value  $p$  (such as 99.95%):

$$q = \frac{C_i(C_2H_4)}{C_i(C_2H_4) + C_i(C_2H_6)} \times \left( \int_{\tau_1}^{\tau_2} f(\tau) d\tau \right), \quad (g(\tau) \geq p) \quad (7)$$

## Computational Details.

All simulations/calculations were performed by the Materials Studio 5.5 package. The preferred sorption locations were searched through Grand Canonical Monte Carlo (GCMC) simulations by using the fixed loading task and Metropolis method in the sorption calculation module. For all the GCMC simulations, the simulation box was set with 8 ( $2 \times 2 \times 2$ ) unit cells while all the frameworks and the gas molecules were described by the universal forcefield (UFF). Both the framework and the gas molecules were regarded as rigid model and the QEq partial charges and QEq charges were employed to the atoms of the framework and guest molecules, respectively. The cutoff distance was set to 18.5 Å for the Lennard-Jones (LJ) interactions, and the electrostatic interactions and the van der Waals interactions were handled using the Ewald and Atom based summation method, respectively. The loading steps, equilibration steps and the production steps were all set to  $1.0 \times 10^7$ . The saturation/maximum uptakes were modeled at 316 K using the fixed pressure task and Metropolis method with  $2.0 \times 10^7$  equilibration steps, followed by  $2.0 \times 10^7$  production steps for computing the ensemble averages.

All energies were calculated by the periodic density functional theory (PDFT) method by the Dmol<sup>3</sup> module. Before the energy calculations, full geometry optimizations with fixed cell parameters were performed to the host-guest systems based on the adsorption conformations obtained from GCMC simulation. The widely used generalized gradient approximation (GGA) with the Perdew-Burke-Ernzerhof (PBE) functional and the double numerical plus d-functions (DNP) basis set, TS for DFT-D correction as well as the Effective Core Potentials (ECP) were used. The energy, force and displacement convergence criteria were set as  $1 \times 10^{-5}$  Ha,  $2 \times 10^{-3}$  Ha and  $5 \times 10^{-3}$  Å, respectively. The energy balance is expressed by the following equations:

$$\Delta E_{\text{ads}} = E_{\text{host+guest}} - E_{\text{apohost}} - E_{\text{guest}} \quad (8)$$

$$\Delta E_{\text{trans}} = E_{\text{host}} - E_{\text{apohost}} \quad (9)$$

$$\Delta E_{\text{fitting}} = E_{\text{host+guest}} - E_{\text{host}} - E_{\text{guest}} \quad (10)$$

Where  $\Delta E_{\text{ads}}$  is the adsorption enthalpy,  $\Delta E_{\text{trans}}$  is the energy change of the host framework after adsorption of guest,  $\Delta E_{\text{fitting}}$  is the interaction energy between the guest and the final host framework, and  $E_{\text{host+guest}}$ ,  $E_{\text{guest}}$ ,  $E_{\text{apohost}}$  and  $E_{\text{host}}$  are the energies of the final host-guest system, the free guest, the guest-free host framework, and the transformed host framework after adsorption, respectively.

### Supplementary References

1. Rowsell, J.L.C., Eckert, J. & Yaghi, O.M. Characterization of H<sub>2</sub> Binding Sites in Prototypical Metal–Organic Frameworks by Inelastic Neutron Scattering. *J. Am. Chem. Soc.* **127**, 14904-14910 (2005).
2. Pires, J., Pinto, M.L. & Saini, V.K. Ethane Selective IRMOF-8 and Its Significance in Ethane–Ethylene Separation by Adsorption. *ACS Appl. Mater. Interfaces* **6**, 12093-12099 (2014).
3. Pillai, R.S., Pinto, M.L., Pires, J., Jorge, M. & Gomes, J.R.B. Understanding Gas Adsorption Selectivity in IRMOF-8 Using Molecular Simulation. *ACS Applied Materials & Interfaces* **7**, 624-637 (2015).
4. Li, J.-R., Kuppler, R.J. & Zhou, H.-C. Selective gas adsorption and separation in metal-organic frameworks. *Chem. Soc. Rev.* **38**, 1477-1504 (2009).
5. He, Y. et al. A microporous lanthanide-tricarboxylate framework with the potential for purification of natural gas. *Chem. Commun.* **48**, 10856-10858 (2012).
